1 **Social chemical communication determines recovery from L1 arrest via**  
2 **DAF-16 activation.**

3

4 Alejandro Mata-Cabana<sup>1</sup>, Laura Gómez-Delgado<sup>1</sup>, Francisco Javier Romero-  
5 Expósito<sup>1</sup>, María Jesús Rodríguez-Palero<sup>2</sup>, Marta Artal-Sanz<sup>2</sup> and María  
6 Olmedo<sup>1</sup>

7

8 1 Departamento de Genética, Facultad de Biología, Universidad de Sevilla,  
9 Avenida Reina Mercedes s/n, 41012 Seville, Spain

10

11 2 Andalusian Center for Developmental Biology, Consejo Superior de  
12 Investigaciones Científicas/Junta de Andalucía/Universidad Pablo de Olavide.  
13 Department of Molecular Biology and Biochemical Engineering. Carretera de  
14 Utrera Km 1, 41013 Seville, Spain.

15

16 Correspondence: [amata@us.es](mailto:amata@us.es), [mariaolmedo@us.es](mailto:mariaolmedo@us.es)

17

18

19

20

21

22

23

24

25

## 1 **ABSTRACT**

2 In a population, chemical communication determines the response of animals to  
3 changing environmental conditions, what leads to an enhanced resistance  
4 against stressors. In response to starvation, the nematode *Caenorhabditis*  
5 *elegans* arrest post-embryonic development as L1 larva right after hatching. As  
6 arrested L1 larvae, *C. elegans* become more resistant to diverse stresses,  
7 allowing them to survive for several weeks expecting to encounter more favorable  
8 conditions. However, prolonged periods in L1 arrest lead to the accumulation of  
9 detrimental signs of aging, which ultimately provoke animal death. When arrested  
10 L1s feed, they undergo a recovery process to erase these harmful signs before  
11 resuming the developmental program. L1 arrested larvae secrete unidentified  
12 soluble compounds that improve survival to starvation. This protection is  
13 proportional to larval population density. Thus, animals arrested at high densities  
14 display an enhanced resistance to starvation. Here we show that this chemical  
15 communication also influences recovery after prolonged periods in L1 arrest.  
16 Animals at high density recovered faster than animals at low density. We found  
17 that the density effect on survival depends on the final effector of the insulin  
18 signaling pathway, the transcription factor DAF-16. Moreover, DAF-16 activation  
19 was higher at high density, consistent with a lower expression of the insulin-like  
20 peptide DAF-28 in the neurons. The improved recovery of animals after arrest at  
21 high density depended on soluble compounds present in the media of arrested  
22 L1s. In a try to find the nature of these compounds, we investigated the  
23 disaccharide trehalose as putative signaling molecule, since its production is  
24 enhanced during L1 arrest and it is able to activate DAF-16. We detected the  
25 presence of secreted trehalose in the medium of arrested L1 larvae at a low

1 concentration. The addition of this concentration of trehalose to animals arrested  
2 at low density was enough to rescue DAF-28 production and DAF-16 activation  
3 to the levels of animals arrested at high density. However, despite activating DAF-  
4 16, trehalose was not capable of reversing survival and recovery phenotypes,  
5 suggesting the participation of additional signaling molecules. We finally identified  
6 GUR-3 as a possible trehalose receptor in *C. elegans*. With all, here we describe  
7 a molecular mechanism underlying social communication that allows *C. elegans*  
8 to maintain arrested L1 larvae ready to quickly recover as soon as they encounter  
9 nutrient sources.

10

## 11 **INTRODUCTION**

12 Chemical communication between individuals of the same population determines  
13 the social behavior in response to environmental variations in a wide variety of  
14 species, from bacteria to mammals (Benabentos et al., 2009; Brückner and  
15 Parker, 2020; Coombes et al., 2018; Doyle and Meeks, 2018; Mukherjee and  
16 Bassler, 2019; Sokolowski, 2010; Taga and Bassler, 2003; Yan et al., 2020).  
17 Chemical communication in *C. elegans* has been mainly associated to  
18 ascaroside pheromones. These pheromones regulate a variety of social  
19 behaviors, including mating attraction, aggregation, foraging or avoidance  
20 (Artyukhin et al., 2013b; Butcher, 2017; Greene et al., 2016; Ludewig and  
21 Schroeder, 2013; MacOsko et al., 2009; Srinivasan et al., 2012, 2008).  
22 Ascarosides were firstly identified as social cues to regulate the entry in an  
23 alternative larval stage, *dauer*, in response to high-density population (Butcher et  
24 al., 2007; Golden and Riddle, 1982). In the form of *dauer* larvae, *C. elegans* can  
25 withstand harsh conditions for prolonged periods (reviewed in Hu, 2007). This

1 exemplifies how social interactions can play a protective role in *C. elegans*,  
2 triggering a response to better resist unfavorable conditions. Animal aggregation  
3 in response to environmental stressors is another example of a protective social  
4 behavior, which allows *C. elegans* to improve survival until environmental  
5 conditions become more favorable (Boender et al., 2011; de Bono et al., 2002;  
6 Sokolowski, 2010).

7 As evolutionary strategy *C. elegans* larvae can arrest their development to  
8 overcome the detrimental effect of facing adverse conditions (Baugh et al., 2013).  
9 *Dauer* arrest is induced in response to diverse environmental cues, such as high  
10 temperature, low food or high population density (Hu, 2007). However, post-  
11 embryonic development can also arrest at the first larval stage, L1, when animals  
12 do not encounter food right after egg hatching. When larvae enter the “L1 arrest”  
13 stage, cell proliferation stops and metabolism decreases. Arrested L1s can  
14 survive weeks without food and show increased resistance to stress. These  
15 worms must necessarily feed to resume development (reviewed in Baugh et al.,  
16 2013). Once these worms grow to adulthood they have normal lifespans, what  
17 was firstly interpreted as suspended aging during L1 arrest (Johnson et al., 1984).  
18 However, an aging process has been recently defined for these larvae, in which  
19 different detrimental signs of aging appear and accumulate during prolonged  
20 starvation (Roux et al., 2016). During a period of recovery after feeding these  
21 aging phenotypes are erased before the arrested L1s resume development  
22 (Roux et al., 2016). The length of the recovery time is directly proportional to the  
23 time in arrest and the grade of accumulation of signs of aging (Olmedo et al.,  
24 2020). However, long periods of L1 arrest impair the capacity of the larvae to  
25 recover (Roux et al., 2016).

1 The insulin/IGF-1 signaling pathway (IIS) is a major promoter of cell proliferation  
2 and growth in presence of food in *C. elegans*. In response to the secretion of  
3 insulin like peptides (ILP) by the sensory neurons, the insulin receptor DAF-2 gets  
4 activated and triggers a phosphorylation cascade. Low insulin signaling leads to  
5 the activation of the main final effector of the pathway, the transcription factor  
6 DAF-16, which migrates to the nucleus where it regulates the expression of  
7 multiple genes (reviewed in Murphy and Hu, 2013). DAF-16 is required for the  
8 larval survival to prolonged starvation (Baugh and Sternberg, 2006; Lee and  
9 Ashrafi, 2008; Muñoz and Riddle, 2003). DAF-16 also determines the aging  
10 process during L1 arrest and the recovery capacity of the larvae after starvation  
11 (Olmedo et al., 2020).

12 There are multiple factors affecting L1 survival to starvation, including  
13 environmental cues and social behavior (Artyukhin et al., 2015, 2013a; Baugh et  
14 al., 2013). Population density strongly influences L1 arrest survival (Artyukhin et  
15 al., 2013a). Larvae arrested at high densities display an enhanced resistance to  
16 starvation. This effect of larval density on survival depends on chemical  
17 communication between animals, in which the participation of sensory neurons  
18 is required. However, the identity of the signaling molecules involved remains  
19 unknown. It was determined that the nature of the signal was a small non-volatile  
20 molecule, but ascarosides were discarded as responsible of the density effect on  
21 L1 survival (Artyukhin et al., 2013a). *Caenorhabditis* species with density  
22 dependence on starvation survival also show L1 aggregation behavior on plates  
23 in the absence of food (Artyukhin et al., 2015, 2013a). Thus, both phenomena  
24 seem to be linked, and aggregation could be a way to locally increase population

1 density, which enhances survival. However, the common thread between these  
2 two phenomena remains unidentified (Artyukhin et al., 2015).  
3 Here we delve into the molecular mechanisms underlying the influence of  
4 population density and chemical communication on the capacity of arrested L1  
5 larvae to resist and recover from long periods of arrest. We first show that high  
6 population density not only enhances survival to starvation but also enhances the  
7 capacity of larvae to recover from extended starvation. Both, survival and  
8 recovery from starvation are mediated by soluble compounds secreted to the  
9 medium. This means that social interaction not only improves the resistance of  
10 arrested L1s to prolonged starvation, but also keeps them ready to respond faster  
11 to a more favorable nutritional condition. We attribute a role for the IIS pathway  
12 in the social communication of the L1s. Animals arrested at high density present  
13 a lower insulin signaling that results in a higher activation of DAF-16, which is  
14 responsible for the enhanced recovery capacity after starvation. In an attempt to  
15 find communication molecules mediating the density effect, we investigated  
16 trehalose as a putative signal initiating the response. This disaccharide is present  
17 in the medium of arrested L1s at a low, density-dependent concentration. Our  
18 results show that trehalose mediates the communication between animals by  
19 reducing IIS signaling. The presence of trehalose in the medium leads to an  
20 inhibition in the production of the ILP DAF-28, and the activation of DAF-16.  
21 However, trehalose supplementation is not sufficient to reverse the shorter  
22 lifespan and longer recovery time of animals starved at low density, indicating  
23 that additional communication molecules are needed to completely explain the  
24 density effect on arrested L1 larvae. Finally, we also suggest GUR-3 as a possible  
25 trehalose receptor in *C. elegans* neurons.

## 1 RESULTS

### 2 Larval density during arrest affects recovery time

3 Prolonged periods of L1 arrest negatively influence starvation survival and the  
4 capacity of larvae to recover after refeeding (Olmedo et al., 2020; Roux et al.,  
5 2016). Larval density is an important factor affecting the survival of arrested L1  
6 (Artyukhin et al., 2013a) and here we explored the possible influence of larval  
7 density during arrest in the recovery process. To do that, we measured recovery  
8 time of animals arrested at different densities by a quantitative method that  
9 precisely measures each stage of the post-embryonic development (Olmedo et  
10 al., 2015) (Fig. 1A). Thus, we arrested L1 larvae at 20, 2 and 0.2 L1/ $\mu$ l, during 1,  
11 4, 8, or 14 days and then resumed development placing individual animals in  
12 wells of a 96 well plate with *E. coli*. This way, the effect of density during arrest is  
13 separated from a possible effect of density during recovery or its effect during  
14 developmental timing (Ludewig et al., 2017). When we looked at the effect of  
15 density during starvation on recovery time, we observed that animals arrested at  
16 lower densities required longer times to recover after extended starvation (Fig.  
17 1B). After 8 days of starvation, the difference between the highest and the lowest  
18 density became statistically significant. Worms arrested at 0.2 L1/ $\mu$ l needed, on  
19 average, 9.9 hours more to recover than those at 20 L1/ $\mu$ l (33.1 h vs. 23.2 h)  
20 (Fig. 1B). Survival of animals arrested at 0.2 L1/ $\mu$ l was dramatically impaired  
21 after 14 days on starvation. Although differences are not statistically significant,  
22 the trend to longer recovery times at lower densities is also observable in worms  
23 arrested at 2 L1/ $\mu$ l (Fig. 1B). Thus, worms at 2 L1/ $\mu$ l took, on average, 5.3 more  
24 hours to recover than those at high density (28.5 h vs. 23.2 h) after 8 days of  
25 arrest, and 13.8 hours more after 14 days of arrest (58.6 h vs. 44.8 h).

1 Interestingly, developmental timing (M1 to M4) is not affected by larval density  
2 during arrest (Supp. Fig. 1A). The delay observed to complete the post-  
3 embryonic development (L1 to M4) at low densities can be completely explained  
4 by the longer recovery times (Supp. Fig. 1B). Therefore, as it happens for  
5 starvation survival, larval density also determines recovery after arrest.

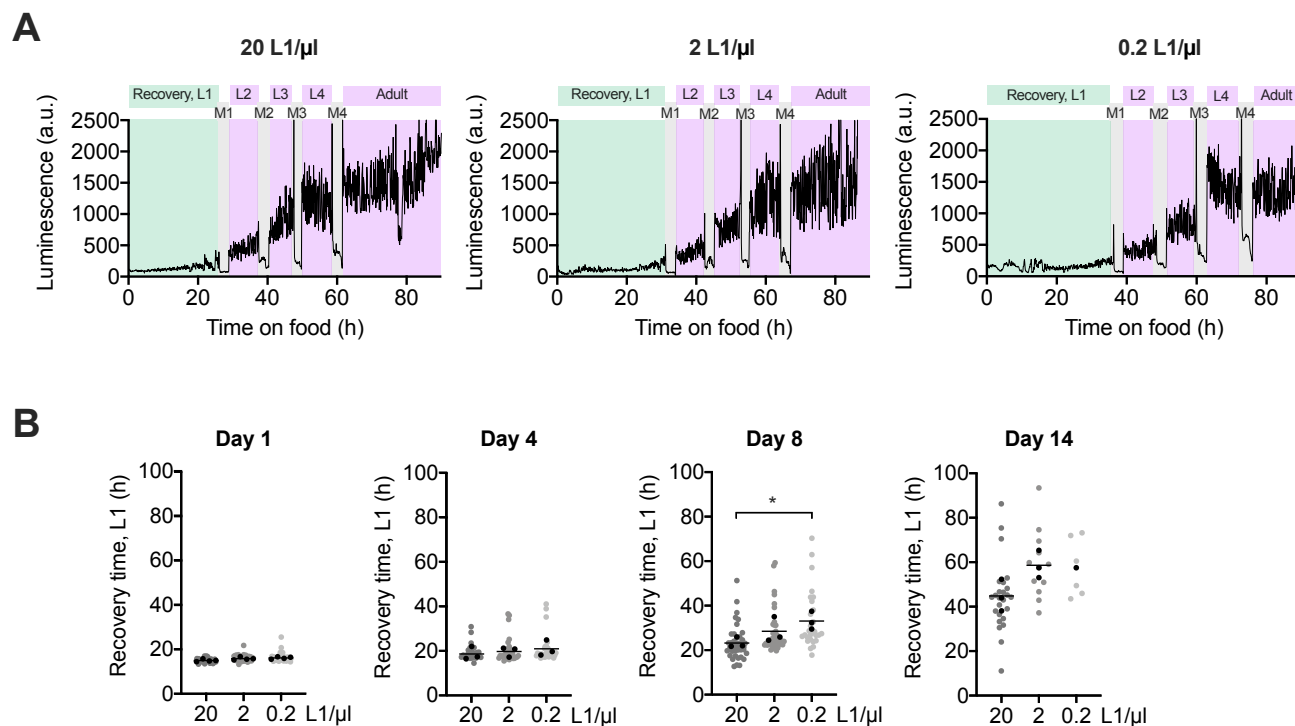

6 **Figure 1.** High population density enhances L1 recovery after prolonged starvation. (A)  
7 Representative luminometry profiles of development of animals arrested at 20, 2 and 0.2  
8 L1/μl. Recovery time is colored in green and it is defined as the time from food addition  
9 to the first molt. The other larval stages and adulthood are colored in purple and the  
10 molts in grey. (B) Recovery times of animals arrested at densities of 20, 2 and 0.2 L1/μl  
11 after 1, 4, 8 and 14 days of starvation. All individual animals from three independent  
12 biological replicates are plotted. Black dots represent the average of each independent  
13 replicate and the black line indicates the mean of the entire experiment. Averages of the  
14 replicates were used for statistics (\* p<0.05, Unpaired t-test). Supp. Fig. 1A and B  
15 respectively show the plots for developmental timing (M1 to M4) and the complete post-  
16 embryonic development (L1 to M4).

17

18



## 1 **DAF-16 mediates larval density effects on recovery from arrest**

2 We recently showed that recovery time after extended arrest is regulated by  
3 Insulin/IGF-1-like signaling (IIS) in a DAF-16 dependent manner, being shorter in  
4 a *daf-2* mutant and longer in a *daf-16* mutant strain (Olmedo et al., 2020). At the  
5 same time, IIS also impacts survival of arrested L1s to prolonged starvation. Low  
6 insulin signaling results in a survival improvement, which is completely abolished  
7 by the loss of DAF-16 (Baugh and Sternberg, 2006; Lee and Ashrafi, 2008;  
8 Muñoz and Riddle, 2003). Arrested L1 larvae at low density show comparable  
9 phenotypes to *daf-16* mutant, higher mortality and a longer recovery time.  
10 Furthermore, mutants affected in the chemosensory proteins DAF-6, OSM-1 and  
11 TAX-4, which are necessary for the density-dependent effect (Artyukhin et al.,  
12 2013a), have an increased expression of *daf-28*, the gene encoding one of the  
13 *C. elegans* insulin-like peptides (ILPs) (Li et al., 2003). DAF-28 is an agonist ILP  
14 that promotes insulin signaling by binding and activating DAF-2 and, therefore, it  
15 represses DAF-16 activation (Kaplan et al., 2019; Li et al., 2003). Taking all this  
16 into consideration, we decided to address the question of DAF-16 as possible  
17 determinant of the effect of density on L1 survival. With this aim, we compared  
18 longevities of L1 larvae of wild-type and *daf-16* deletion strains arrested at  
19 different densities (Fig. 2A). To do that we transferred larvae from M9 buffer to  
20 NGM plates with food at the indicated times and determined the percentage of  
21 arrested L1s able to recover from arrest and complete development. Wild type  
22 larvae recovery was directly proportional to the density (Fig. 2A), and there was  
23 a progressive reduction in the half-life from the highest to the lowest density (Fig.  
24 2B). Thus, the half-life of worms arrested at 2 L1/ $\mu$ l was around 7 days shorter  
25 than those arrested at 20 L1/ $\mu$ l, and larvae arrested at 0.2 L1/ $\mu$ l showed a half-

1 life almost 6 days shorter than those at 2 L1/ $\mu$ l (Fig. 2B). With this experiment we  
2 also confirmed the impaired survival of the *daf-16* mutant L1 arrested larvae to  
3 prolonged starvation (Fig. 2B). At the highest density, the wild-type strain showed  
4 a half-life of around 23 days on average, and the half-life of the *daf-16* mutant  
5 was of around 7 days. Moreover, loss of DAF-16 completely abolished the density  
6 effect on L1 survival to starvation, since no differences are observed between the  
7 longevities of mutant larvae arrested at the three densities tested (Fig. 2A and  
8 B). In terms of longevity, the lowest density treatment applied to the wild type is  
9 not as severe as the loss of DAF-16, being the half-life of the mutant at high  
10 density in the range of 3 days shorter than the wild type at 0.2 L1/ $\mu$ l.

11 The density effect on recovery time was observable in the wild type only after 8  
12 days of arrest (Fig. 1B). At this time of arrest, the percentage of animals that  
13 recover is 83,6%. However, to assess this effect in the *daf-16* mutant we could  
14 not use such a long starvation period, since at this time arrested L1 larvae of this  
15 mutant barely survive. Instead, we analyzed recovery time in the *daf-16* mutant  
16 after 4 days of starvation, the rate of recovery is at 85 %, indicating a similar  
17 situation to the wild-type strain at day 8 (Fig. 2A). By doing this we found that  
18 there were no differences in recovery time between *daf-16* animals at the different  
19 densities tested after 4 days of arrest (Fig. 2C). At all densities, *daf-16* mutants  
20 needed a time to recover of about 33 hours, similar to the wild type arrested for  
21 8 days at the lowest density tested. This result shows that the density effect on  
22 recovery time after starvation depends on DAF-16.

23

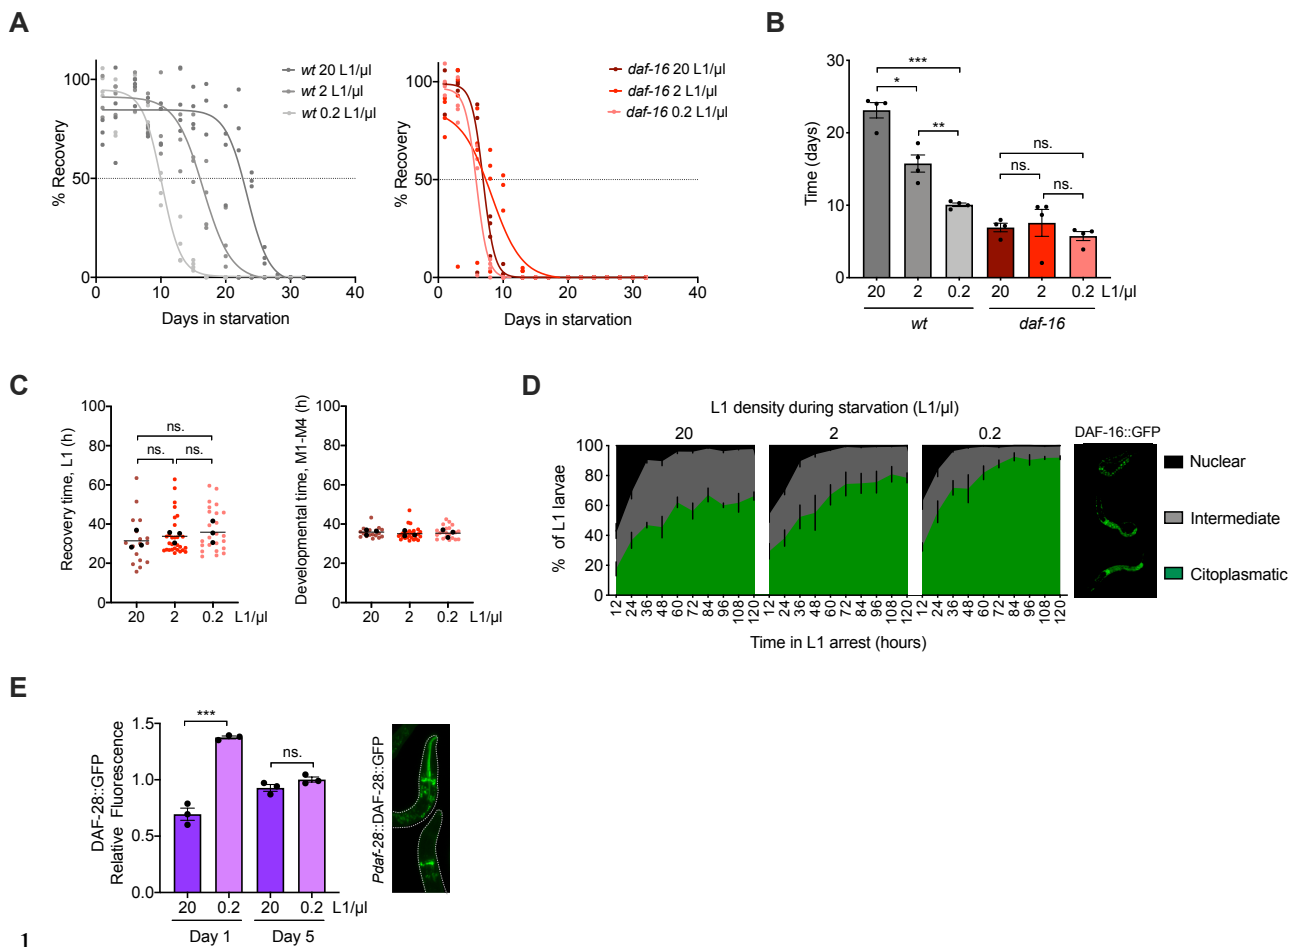

1

2 **Figure 2.** The density effect is mediated by DAF-16 activation. (A) Percentage of animals

3 arrested at densities of 20, 2 and 0.2 L1/μl that recover after different periods of

4 starvation. Survival curves for wild-type strain (left), and *daf-16* mutant (right). Each

5 percentage calculated every 2-3 days is independently plotted as colored dots for four

6 biological replicates. Curve fitting was performed using the data from the four replicates.

7 The horizontal dotted line marks the 50% recovery, referred in the text as half-life. (B)

8 Comparison of the half-lives in days of wild-type and *daf-16* strains arrested at 20, 2 and

9 0.2 L1/μl. Black dots represent the value for each independent replicate. The bars mark

10 the mean of the entire experiment and error bars shows the SEM (\* p<0.05, \*\* p<0.01,

11 \*\*\* p<0.001, one-way ANOVA).(C) Recovery time (L1) and developmental time (M1-M4)

12 of *daf-16* mutant arrested at 20, 2 and 0.2 L1/μl after 4 days of starvation. Each colored

13 dot represents the data from a single animal analyzed from three independent biological

14 replicates. Black dots represent the average of each independent replicate and the line

15 marks the mean of the entire experiment. Averages of the replicates were used for

16 statistics (one-way ANOVA). (D) Subcellular localization of DAF-16::GFP in L1 larvae

17 arrested at densities of 20, 2 and 0.2 L1/μl for 1 to 5 days in starvation. Statistics are

18 shown in Supp. Fig. 1C. (E) Quantification of the expression of DAF-28::GFP in the

1 heads of L1 larvae arrested at 20 and 0.2 L1/μl for 1 or 5 days. Black dots represent the  
2 average of each independent replicate. The bars mark the mean of the entire experiment  
3 and error bars shows the SEM (\*\*\*)  $p < 0.001$ , Unpaired t-test).

4

5 Due to the lack of density effect in the *daf-16* mutant we asked whether the  
6 density could be reflected in a different activation level of this transcription factor.

7 To address this question, we used a reporter strain expressing DAF-16 fused to

8 GFP, which allows the visualization of the subcellular localization of DAF-16. We

9 quantified the percentage of animals containing the activated version of the

10 protein. Doing this quantification every 12 hours for 5 days, we observed that the

11 nuclear localization of DAF-16 was higher at high density from the beginning of

12 the experiment and it was more sustained during all the period of starvation when

13 compared to the lower densities tested. The level and speed of DAF-16

14 inactivation was inversely proportional to the population density (Fig. 2D, Supp.

15 Fig. 1C). Therefore, this result suggests the presence of a signaling molecule in

16 the medium that eventually triggers the activation of DAF-16, which exerts its

17 protective role against starvation.

18 The lack of the density effect in *tax-4*, *osm-11* and *daf-6* mutants, which have

19 increased DAF-28 (Artyukhin et al., 2013a), suggests that this ILP could be also

20 involved in the effect of density. Since activation of IIS by DAF-28 leads to

21 inactivation of DAF-16 (Li et al., 2003), this ILP seems a plausible candidate to

22 mediate the density effect on DAF-16 activation. To confirm this mechanism, we

23 analyzed the expression of DAF-28 using a fluorescent reporter, in which the

24 peptide is fused to GFP and it is under the control of its endogenous promoter.

25 We quantified the signal in the head of individual worms arrested at high density,

26 20 L1/μl, and low density, 0.2 L1/μl, after 1 and 5 days of arrest (Fig. 2E). We

1 found a higher DAF-28 production in L1 larvae at low density after 1 day of arrest,  
2 which correlates with a lower activation of DAF-16 at this density. After 5 days of  
3 arrest the difference in DAF-28 production between densities disappeared. The  
4 signal measured at low density decreased from 1 to 5 days of arrest. However,  
5 the DAF-28::GFP signal at high density after 5 days of arrest is higher than after  
6 1 day of arrest, what would suggest a partial loss of the IIS repression during  
7 prolonged starvation periods. This correlates with the gradual increase in the  
8 cytoplasmic localization of DAF-16 during the arrest. Nevertheless, the lower  
9 DAF-28 production after 5 days of starvation, when we find the lowest activation  
10 of DAF-16, reveals that other mechanisms different to the increase in DAF-28  
11 production might be involved in DAF-16 inactivation during prolonged starvation.

12

### 13 **Secreted soluble compounds promote recovery and activate DAF-16 in** 14 **arrested L1 larvae**

15 As previously exposed, a signaling molecule of unidentified nature is responsible  
16 for the density effect on L1 starvation survival (Artyukhin et al., 2013a). When  
17 conditioned medium (CM), collected from L1 cultures arrested at high density,  
18 was used to arrest larvae at low densities, it rescued the survival impairment  
19 proper of low population density (Artyukhin et al., 2013a). With this precedent,  
20 we asked whether the high concentration of the unknown signaling molecule  
21 contained in the CM of larvae arrested at high density was also capable of  
22 reducing the recovery time of worms arrested at low density. We found that CM  
23 shortened the recovery time of L1 at low density to the level of animals arrested  
24 at high density for 8 days (Fig. 3A). Therefore, communication between animals  
25 through soluble compounds is important to improve survival to starvation and

1 recovery from arrest after refeeding.

2 We next analyzed the density dependence of DAF-16 activation in mutants of two  
3 of the chemosensory proteins, DAF-6 and TAX-4, described to be involved in the  
4 density effect (Artyukhin et al., 2013a). Both mutants, together with *osm-1*  
5 mutant, are defective in sensory neuron functioning and present an elevated *daf-*  
6 *28* expression level (Li et al., 2003). According to our results, DAF-16 showed a  
7 lower activation level in both mutants compared to the wild-type strain after 1 day  
8 of arrest (Fig. 3B, Supp. Fig. 2A). The effect was more dramatic in *tax-4* mutant,  
9 where the nuclear form of DAF-16 was inappreciable at both high and low density,  
10 what could explain the loss of density effect in L1 starvation survival. However,  
11 we could still observe an effect of density in the activation of DAF-16 in the *daf-6*  
12 mutant. Nevertheless, the higher DAF-16 nuclear localization at high density in  
13 this mutant was still lower than in the wild type at low density. This could explain  
14 the loss of the density effect showed in Artyukhin et al., 2013. Strikingly, there  
15 was a reactivation of DAF-16 in the *daf-6* mutant after 5 days in starvation (Fig.  
16 3B, Supp. Fig. 2A). Although further investigations are necessary to explain this  
17 phenomena, it is possible that neuronal sensing is not completely abolished since  
18 some sensory cilia remain exposed in the mutant (Oikonomou et al., 2011). In  
19 conclusion, a correct functioning of the sensorial system was necessary for the  
20 density effect in arrested L1s, but the nature of the secreted signal remained still  
21 unknown.

22

**A**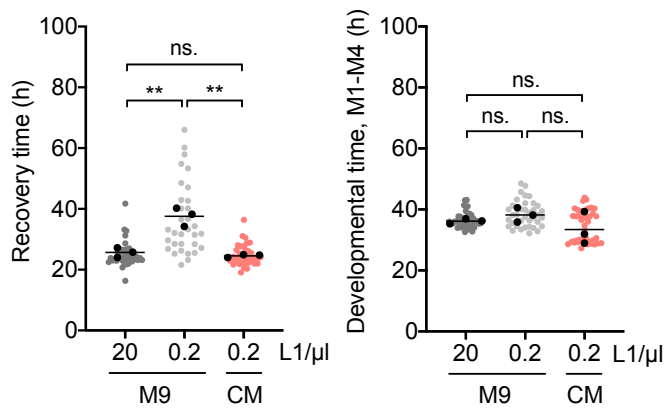**B**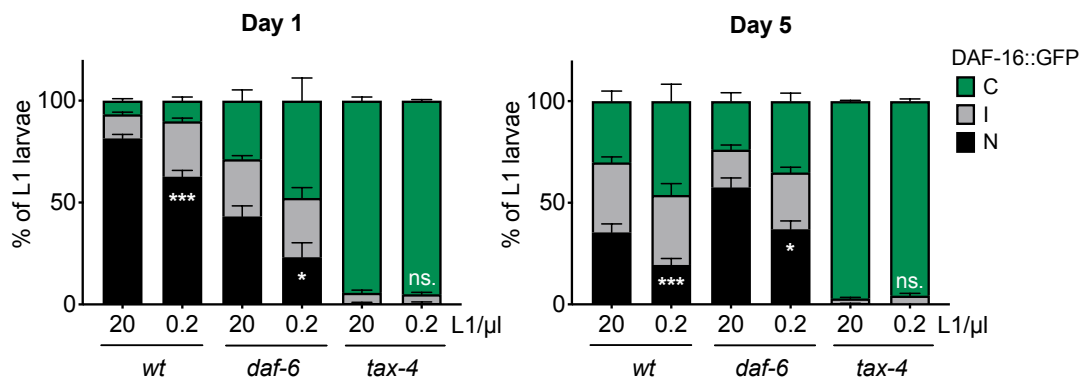

1

2 **Figure 3.** Chemical communication determines recovery and DAF-16 activation. (A)

3 Comparison of recovery time (L1) and developmental time (M1-M4) after 8 days of

4 starvation between animals arrested at 0.2 L1/μl in conditioned medium (CM) and

5 animals arrested in M9 buffer at 20 and 0.2 L1/μl. Each colored dot represents the data

6 from a single animal analyzed from three independent biological replicates. Black dots

7 represent the average of each independent replicate and the line marks the mean of the

8 entire experiment. Averages of the replicates were used for statistics (\*\* p&lt;0.01,

9 Unpaired t-test). (B) Subcellular localization of DAF-16::GFP in L1 larvae arrested at 20

10 and 0.2 L1/μl for 1 and 5 days in *wt*, *daf-6* and *tax-4* mutant strains. The histograms show

11 the means of, at least, three independent replicates and the error bars represent the

12 SEM. Statistics for nuclear localization of DAF-16 are shown (\* p&lt;0.05, \*\*\* p&lt;0.001,

13 Unpaired t-test). Independent plots for the three localization categories are depicted in

14 Supp. Fig. 2A.

15

16

17

## 1 **Trehalose present in the media during L1 arrest modulates DAF-16** 2 **activation**

3 Arrested L1 larvae undergo a carbon metabolism shift towards the synthesis of  
4 the disaccharide trehalose promoted by DAF-16, which supports survival during  
5 starvation (Hibshman et al., 2017). Moreover, trehalose is able to activate DAF-  
6 16 in adult worms, since the addition of this sugar induces the expression of  
7 several DAF-16 targets (Seo et al., 2018). The evaluation of these two results  
8 together would suggest a positive feedback loop, where DAF-16 would promote  
9 the synthesis of trehalose and the disaccharide would, in turn, activate DAF-16.  
10 Therefore, we explored the involvement of trehalose as signaling molecule in the  
11 density effect on the L1 response to starvation. We first checked the possible  
12 presence of trehalose in the M9 medium where L1 larvae were arrested. To  
13 detect trehalose we used an enzymatic assay that involves the participation of  
14 trehalase, the enzyme that specifically hydrolyzes trehalose to two glucose  
15 molecules. We measured trehalose from the supernatant of L1 larvae arrested at  
16 different densities and we found trehalose in the  $\mu\text{M}$  range, which proportionally  
17 increased with the population density of the sample (Fig. 4A, left). We also found  
18 that trehalose concentration, normalized to the number of larvae hatched in each  
19 experiment, increased in the medium throughout the starvation period (Fig. 4A,  
20 right). There was a fast increase from 1 day after egg preparation until day 5,  
21 indicating that there is a secretion of trehalose by the larva to the medium during  
22 the first days of starvation. Then, trehalose concentration stabilized until the end  
23 of the experiment at day 15 of starvation. This suggests that there is not an  
24 effective consumption of the secreted disaccharide during the arrest, although  
25 we cannot discard an equilibrium between secretion and consumption after those



1 first days of starvation. We then tried to elucidate the molecular response exerted  
2 by the addition of trehalose to larvae arrested at low density. For the following  
3 experiments we decided to use a trehalose concentration of 5  $\mu$ M, which is the  
4 approximated concentration found in the supernatant of L1s arrested at high  
5 density, 20 L1/ $\mu$ l. The trehalose concentration measured for the DAF-16 reporter  
6 strain was slightly higher than for the *wt*, but not statically significant (Supp. Fig.  
7 2B). Thus, exogenously added trehalose restored DAF-16 activation in worms at  
8 low density to similar levels to the larvae at high density (Fig. 4B, Supp. Fig. 3).  
9 This result was supported by the reduction in DAF-28 production when trehalose  
10 was added to L1s at low density (Fig. 4C). The insulin repression by trehalose  
11 was lost in the *daf-16* mutant, indicating the participation of DAF-16 in the  
12 blockage of ILP expression in sensory neurons in response to trehalose. As a  
13 consequence, the lack of *daf-16* also increased the synthesis of DAF-28 at high  
14 density when compared to wild type (Fig. 4C). These data reflect a positive  
15 feedback loop between DAF-16 and DAF-28, which was already known (Kaplan  
16 et al., 2019). We conclude that the trehalose secreted by the arrested L1s is  
17 sensed by the larvae, and that it influences the DAF-16/DAF-28 feedback, finally  
18 resulting in a higher DAF-16 activation. The diluted trehalose concentration in the  
19 medium of animals at low density results in a lower activation level of DAF-16.  
20

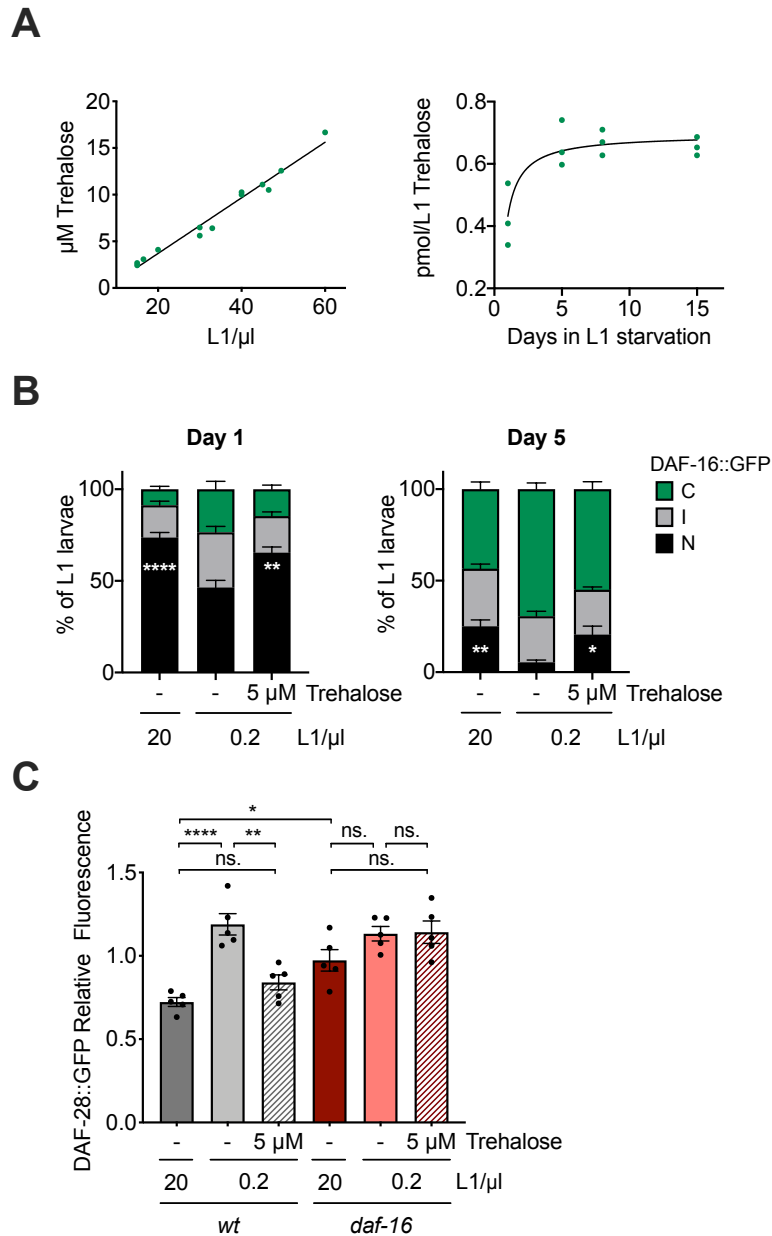

1

2 **Figure 4.** Secreted trehalose mediates DAF-16 activation in arrested L1 larvae. (A)  
 3 Trehalose concentration ( $\mu\text{M}$ ) in the medium of L1 larvae arrested at different densities  
 4 after 1 day of starvation (left panel). Trehalose content in the medium during prolonged  
 5 starvation, relative to the number of L1 larvae in the sample after one day of embryo  
 6 preparation (right panel). (B) Subcellular localization of DAF-16::GFP after 1 and 5 days  
 7 of starvation upon addition of 5  $\mu\text{M}$  of trehalose to L1 larvae arrested at 0.2 L1/ $\mu\text{l}$ ,  
 8 compared with animals arrested at 20 and 0.2 L1/ $\mu\text{l}$  without trehalose. The histograms  
 9 show the means of eight independent replicates and the error bars represent the SEM.  
 10 Statistics for nuclear localization of DAF-16 are shown (\*  $p < 0.05$ , \*\*  $p < 0.01$ , \*\*\*\*  
 11  $p < 0.0001$ , one-way ANOVA). Independent plots for the three localization categories are  
 12 depicted in Supp. Fig. 3. (C) DAF-28::GFP accumulation in the head of the animals in

1 response to the addition of 5  $\mu$ M of trehalose to L1 wild type and *daf-16* mutant larvae  
2 arrested at 0.2 L1/ $\mu$ l after 1 and 5 days of starvation, compared with animals arrested at  
3 20 and 0.2 L1/ $\mu$ l without trehalose. Fluorescence measured for every animal was  
4 normalized to the mean signal of each independent replicate. Black dots represent the  
5 average relative fluorescence of each replicate. The histograms show the means of five  
6 independent replicates and the error bars represent the SEM. Averages of the replicates  
7 were used for statistics (\*  $p < 0.05$ , \*\*  $p < 0.01$ , \*\*\*\*  $p < 0.0001$ , one-way ANOVA).

8  
9  
10 **Trehalose does not reverse the detrimental effects of low density on its**  
11 **own.**

12 Since trehalose addition restored DAF-16 activation in arrested larvae at low  
13 density, we studied if it was also able to reverse the survival and recovery  
14 phenotypes associated to population density. When trehalose was added to the  
15 medium of larvae arrested at low density to a final concentration of 5  $\mu$ M, the  
16 recovery percentage of those animals did not improve to high-density levels (Fig.  
17 5A). Neither did the recovery time, although it showed a statistically non-  
18 significant shortening (Fig. 5B). These results indicate that trehalose, on its own,  
19 is not sufficient to mediate the density effect. However, we show here that density  
20 effect on the percentage of animals able to recover was completely dependent  
21 on DAF-16 and that trehalose addition was sufficient to reactivate DAF-16 in  
22 animals at low density. Two possible explanations would resolve this dilemma,  
23 both involving the participation of other signaling molecules. On one hand,  
24 trehalose could trigger a response in the treated animals, and potentially promote  
25 the secretion, in a DAF-16 dependent manner, of other molecules involved in the  
26 density effect. On the other hand, DAF-16 could be necessary but not sufficient  
27 to control the density effect, due to the necessity of other factors dependent on  
28 signals different from trehalose. In both cases, these putative signaling molecules

1 would never reach a sufficient concentration in the medium of the worms at low  
2 density to reverse the phenotype when treated only with trehalose. However, in  
3 animals at high density, they could reach an optimal concentration, what would  
4 allow us to observe the actual participation of trehalose. To evaluate this  
5 possibility, we washed off the medium of L1 larvae arrested at high density after  
6 24 hours of egg preparation, so every molecule released during hatching or  
7 secreted by the larvae were removed. Even then, larvae would continue secreting  
8 molecules to the medium, that eventually could reach a high concentration, so  
9 the expected phenotypes would not be as dramatic as in the animals at low  
10 density. Doing this, we first analyzed the recovery percentage of the worms after  
11 washing and how trehalose addition could alter it. We observed that recovery  
12 percentage of washed worms was somewhat reduced, and that this impairment  
13 was rescued by trehalose addition, however differences were not statistically  
14 significant (Fig. 6A). Since these were very long experiments, in which the  
15 animals could be actively secreting trehalose, we decided to use a mutant lacking  
16 the two trehalose synthases (TPS-1 and TPS-2) of *C. elegans*. This mutant was  
17 more sensitive to the wash, and the recovery percentage was rescued by the  
18 addition of trehalose (Fig. 6B). This result is in agreement with the possible  
19 presence of other secreted molecules that improve survival. The wash transiently  
20 reduced the level of DAF-16 activation, and it was recovered by trehalose  
21 addition, when we measured after 1 day of starvation (Fig. 6C, Supp. Fig. 4B).  
22 However, after 5 days of starvation this effect was no longer observable, and  
23 even DAF-16 activation was a bit higher in the washed sample. To further explore  
24 the role of trehalose as signaling molecule, we analyzed the DAF-16 activation  
25 level in the *tps-1; tps-2* double mutant. Here, we found that there were no

1 differences in the DAF-16 localization between high and low densities, and its  
 2 activation level was lower in the mutant than in the wild-type strain (Fig. 6D, Supp.  
 3 Fig. 4C), what confirms that trehalose is necessary for the effect of density in  
 4 DAF-16 activity.

**A**

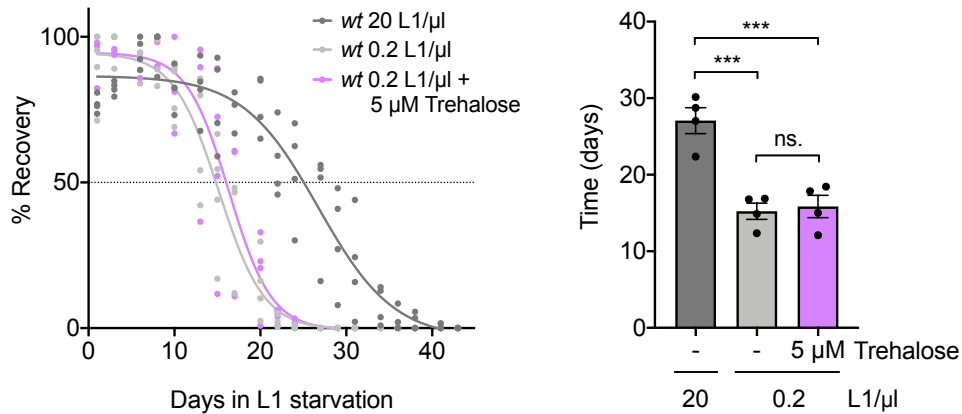

**B**

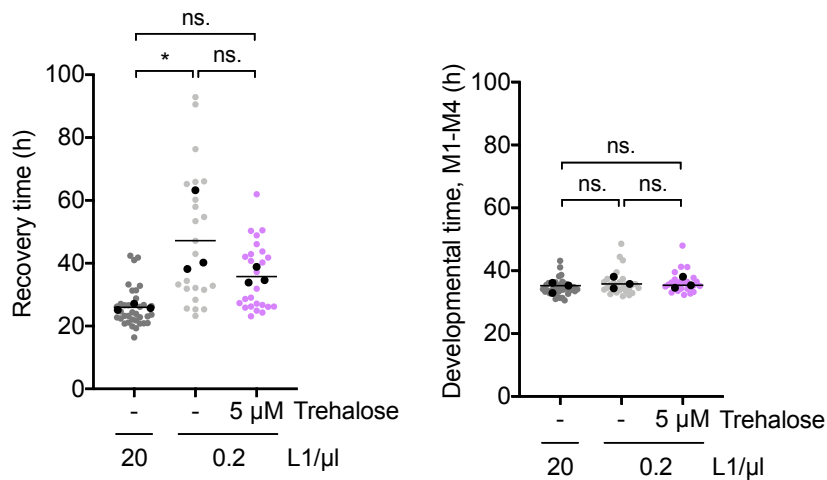

5

6 **Figure 5.** Trehalose supplementation is not sufficient to reverse survival and recovery of  
 7 larvae arrested at low density. (A) Effect of the addition of 5 μM of trehalose on the  
 8 percentage of wild-type animals arrested at 0.2 L1/μl that recover after different periods  
 9 of starvation, compared with animals arrested at 20 and 0.2 L1/μl with no trehalose  
 10 addition. Left: Percentage of recovery calculated every 2-3 days is independently plotted  
 11 as colored dots for the four biological replicates. Curve fitting was performed using the  
 12 data set from the four replicates. The horizontal dotted line marks the 50% recovery (half-  
 13 life). Right: half-lives calculated from the fitting recovery curves. Black dots represent the  
 14 value of each independent replicate. The bars mark the mean of the entire experiment  
 15 and error bars shows the SEM (\*\*\*)  $p < 0.001$ , one-way ANOVA). (B) Recovery time (L1)

1 and developmental time (M1-M4) after 8 days of starvation of animals arrested at 0.2  
 2 L1/μl treated with trehalose 5 μM and animals arrested at 20 and 0.2 L1/μl without  
 3 trehalose. Every colored dot represents the data from each animal analyzed. Black dots  
 4 represent the average of each of the three independent replicates and the line marks the  
 5 mean of the entire experiment. Averages of the replicates were used for statistics (\*  
 6 p<0.05, one-way ANOVA).

7

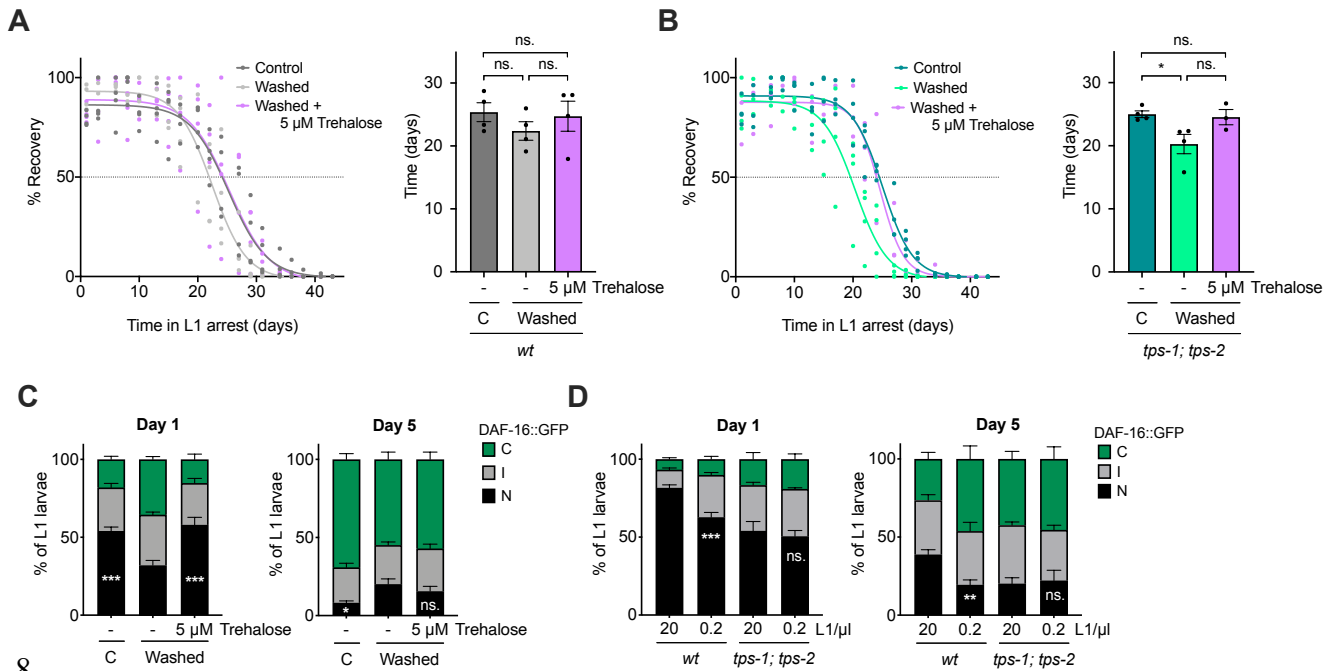

8

9

10 **Figure 6.** Trehalose mediates the response in animals at high density. Effect of trehalose  
 11 addition (5 μM) on the percentage of wild-type (A) and *tps-1; tps-2* (B) animals that  
 12 recover from different periods of arrest at 20 L1/μl after washing off the medium where  
 13 larvae hatched. In control samples, medium was not washed and trehalose was not  
 14 added. Recovery curves for wild-type (A) and *tps-1; tps-2* mutant (B) are plotted in the  
 15 corresponding left panels. Each percentage calculated every 2-3 days is independently  
 16 plotted as colored dots for the four biological replicates. Curves fitting was performed  
 17 using the data set from, at least, three replicates. The horizontal dotted line marks the  
 18 50% recovery (half-life). In the right panels, half-lives calculated from the fitting curves in  
 19 the left panels. Black dots represent the average of each independent replicate. The bars  
 20 mark the mean of the entire experiment and error bars shows the SEM. Averages of the  
 21 replicates were used for statistics (\*\*\* p<0.001, one-way ANOVA). (C) Subcellular  
 22 localization of DAF-16::GFP in L1 larvae arrested at 20 L1/μl at 1 and 5 days after  
 23 washing the medium. Trehalose was added to one sample to a final concentration of 5

1  $\mu\text{M}$ . In control sample the original medium was not removed and trehalose was not  
2 added. (D) Subcellular localization of DAF-16::GFP in wild type and *tps-1; tps-2* L1 larvae  
3 arrested at 20 and 0.2 L1/ $\mu\text{l}$  after 1 and 5 days of starvation. (C and D) The histograms  
4 show the means of, at least, four independent replicates and the error bars represent the  
5 SEM. Statistics for nuclear localization of DAF-16 are shown (\*  $p < 0.05$ , \*\*  $p < 0.01$ , \*\*\*  
6  $p < 0.001$ , one-way ANOVA in (C) and Unpaired t-test in (D)). Independent plots for the  
7 three localization categories are depicted in Supp. Fig. 4B and C.

8  
9 This process must involve a receptor that senses exogenous trehalose. We  
10 tested GUR-3 as possible trehalose receptor in *C. elegans*, since this is the only  
11 protein in the worm with homology to Gr5a, the trehalose receptor of *Drosophila*  
12 *melanogaster* (Chyb et al., 2003). GUR-3 is a gustatory receptor expressed in  
13 different neurons, including the pharyngeal neurons I2s, and it is involved in the  
14 sensing of hydrogen peroxide, light and temperature (Bhatla and Horvitz, 2015;  
15 Goya et al., 2016). GUR-3 and Gr5a have a global similarity of 30% and an  
16 identity of 14.9%. However, according to the domain prediction tool SMART,  
17 GUR-3 conserves the trehalose receptor domain of Gr5a (Supp. Fig. 5 A and B).  
18 To check if the *gur-3* mutant was sensitive to the presence of trehalose in the  
19 medium, we analyzed the DAF-16 activation level at low density and high density,  
20 and in response to the addition of trehalose. Unlike what happens in the *wt*,  
21 neither density nor trehalose affected the nuclear localization of DAF-16 in the  
22 *gur-3* mutant. Overall, nuclear DAF-16 in *gur-3* mutants was reduced compared  
23 to wild type animals (Fig. 7, Supp. Fig. 5 C). This indicated that the *gur-3* mutant  
24 was insensitive to the presence of trehalose, supporting a role for GUR-3 as a  
25 trehalose receptor.

26

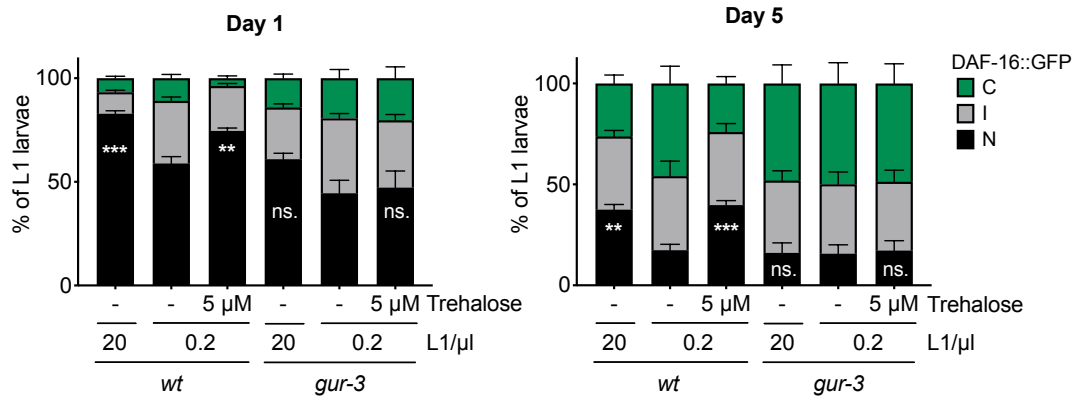

**Figure 7.** GUR-3 mediates DAF-16 activation by trehalose addition. Subcellular localization of DAF-16::GFP in wild type and *gur-3* L1 larvae arrested at 20 and 0.2 L1/μl after 1 and 5 days of starvation. Trehalose to a final concentration of 5 μM was added to animals at low density. Animals at high density were used as control. The histograms show the means of, at least, three independent replicates and the error bars represent the SEM. Statistics for nuclear localization of DAF-16 are shown (\*\* p<0.01, \*\*\* p<0.001, one-way ANOVA). Independent plots for the three localization categories are depicted in Supp. Fig. 5 C.

## DISCUSSION

Social interaction plays a protective role in arrested L1s. High density population improves survival of arrested L1 larvae to starvation (Artyukhin et al., 2013a). Aggregation behavior displayed by arrested L1s on agar plates in absence of food generates a local high density of animals, which could promote starvation survival (Artyukhin et al., 2015). Aggregation is also beneficial against external stressors in adult *C. elegans* (Boender et al., 2011). Longevity is extended when exposed to low oxygen environments, below normoxia (21%) (Honda et al., 1993). Aggregation provides to *C. elegans* its preferred oxygen levels (6 %) inside the aggregate (Gray et al., 2004; Rogers et al., 2006). This behavior also occurs in response to other noxious stimuli (Boender et al., 2011). Moreover, the high-density population in the aggregate leads to *dauer* formation, which allows



1 worms to survive until the environmental conditions are optimal (de Bono et al.,  
2 2002). Therefore, it appears that *C. elegans* has adopted a collective social  
3 behavior entailing high population density as strategy to resist detrimental  
4 conditions.

5 Here we show that high population density not only enhances survival of arrested  
6 L1 to starvation (Artyukhin et al., 2013a), but it also predisposes to a better  
7 recovery after arrest (Fig. 3A). This means that these animals will develop and  
8 adapt faster to new optimal conditions. Thus, in a situation of competition for the  
9 same resources with other species, *C. elegans*, as population, will be able to  
10 optimize the available resources and will have an advantage. In the case of  
11 *Caenorhabditis* species with no social behavior, individual animals adopt an  
12 explorative behavior in absence of food, and, as a consequence, they lack the  
13 starvation survival enhancement in response to high-population density  
14 (Artyukhin et al., 2015).

15 With the aim of unravelling the molecular mechanisms underneath, we have  
16 tested DAF-16, a main determinant of L1 starvation survival (Baugh and  
17 Sternberg, 2006; Lee and Ashrafi, 2008; Muñoz and Riddle, 2003) and recovery  
18 (Olmedo et al., 2020). Arrested L1s are more resistant to stress (Muñoz and  
19 Riddle, 2003; Weinkove et al., 2006), since the activation of DAF-16 during  
20 starvation leads to up-regulation of stress response genes (Baugh et al., 2009;  
21 Kaplan et al., 2019). DAF-16 activation directly influences starvation survival, but  
22 also determines the level of accumulation of signs of aging during prolonged L1  
23 arrest. Thus, arrested *daf-2* mutant L1 larvae, which present higher DAF-16  
24 activation, display lower levels of aging phenotypes after long periods of  
25 starvation (Olmedo et al., 2020). The progressive accumulation of these

1 phenotypes during the aging process in arrested L1s impairs their recovery  
2 capacity after refeeding (Olmedo et al., 2020; Roux et al., 2016). Here we show  
3 that the density effect on the capacity of arrested L1s to recover from prolonged  
4 starvation depends on DAF-16, whose activation is higher at high densities (Fig.  
5 2E). This might be interpreted as if the lower DAF-16 activation level at low  
6 density, and its absence in the mutant, leads to a lower stress resistance  
7 response. This reduced response could lead to a higher accumulation of cellular  
8 damage during prolonged arrest, resulting in an impaired capacity for recovery,  
9 and reduced survival. We would like to note that the effect of lacking DAF-16 is  
10 more severe than the effect of being arrested at low density in terms of  
11 percentage of recovery (Fig. 2A and B). This is also evidenced by the fact that,  
12 while none of the *daf-16* L1 larvae recovered after 8 days of arrest, a number of  
13 wild-type animals arrested at low density did recover, allowing us to estimate  
14 recovery time (Fig. 1B). This suggests some DAF-16 protective activity in worms  
15 at low density, which is completely absent in the mutant. This can also be seen  
16 in the level of DAF-16 activation, which is detected even at low density (Fig. 2D,  
17 Fig. 3B, Fig. 4A, Fig. 6D and Fig. 7). Total absence of DAF-16 activation is only  
18 observed in the case of the *tax-4* mutant strain, which remains insensitive to  
19 density changes due to a sensory defect resulting in a constitutive activation of  
20 the IIS. Therefore, the density effect on recovery from starvation and survival  
21 requires DAF-16, which becomes more activated in animals that sense high-  
22 density cues.

23 The presence of unknown signaling molecules in the supernatant of arrested  
24 larvae supports survival in L1s at high density and recovers the short longevity of  
25 animals at low densities (Artyukhin et al., 2013a). According to our results, the

1 conditioned medium from L1s arrested at high density was also able to rescue  
2 the longer recovery time of L1s at low density (Fig. 3A). So, these molecules are  
3 sufficient to trigger the resistance response to starvation, which allows the  
4 arrested L1s to survive longer and recover faster. These signaling molecules,  
5 abundant at high density, reduced the production of the insulin DAF-28 at the  
6 beginning of the starvation period (Fig. 2E). This reduction of insulin in sensory  
7 neurons would lead to an activation of DAF-16 (Kaplan et al., 2019). At the same  
8 time, DAF-16 activation seems to feed back to repress DAF-28 (Fig. 4C), since  
9 the *daf-16* mutant shows increased signal of DAF-28::GFP. This is consistent  
10 with previously published data. *C. elegans* contains 40 genes coding for insulin-  
11 like peptides (ILPs), which can act as agonist or antagonist of the insulin receptor  
12 DAF-2 (Kaplan et al., 2019; Pierce et al., 2001). Positive and negative feedback  
13 via DAF-16 regulation has been reported for most of the insulin peptides over L1  
14 arrest, and in the transition to development resumption (Kaplan et al., 2019).  
15 DAF-28 is an agonist ILP, and as such it promotes development and reproductive  
16 growth in response to feeding (Chen and Baugh, 2014; Li et al., 2003). DAF-28  
17 is repressed by DAF-16 in the arrested L1, suggesting a positive feedback  
18 (Kaplan et al., 2019). *daf-28* expression is downregulated during starvation or  
19 upon application of *dauer* pheromone (Li et al., 2003). Furthermore, it is required  
20 for the response to food perception, even when ingestion is absent (Kaplan et al.,  
21 2018), and its expression also decreases in response to high temperature  
22 (Kaplan et al., 2019). Therefore, *daf-28* expression is regulated by a variety of  
23 environmental cues, including molecules in the medium and temperature. So, it  
24 appears reasonable that the production of this insulin in the sensory neurons

1 could be regulated by the secreted molecules that mediate communication  
2 between animals.

3 In a search for possible communication molecules that could be involved in the  
4 effect of density, we tested trehalose. We chose it because it is a molecule whose  
5 synthesis is upregulated in arrested L1s (Hibshman et al., 2017) and it activates  
6 DAF-16 (Seo et al., 2018). Trehalose is present in a wide variety of organisms  
7 (Elbein et al., 2003). It is capable of stabilizing membranes and proteins, what  
8 makes it a protective molecule against a diversity of stresses, including  
9 desiccation, heat, cold, and oxidative stress. Trehalose also prevents denatured  
10 proteins from aggregating (Crowe, 2007; Elbein et al., 2003; Singer and  
11 Lindquist, 1998). In *C. elegans*, trehalose is necessary for desiccation tolerance  
12 of the *dauer* larvae (Erkut et al., 2011). Trehalose addition to the adults enhances  
13 longevity and thermotolerance (Honda et al., 2010). This longevity extension is  
14 completely dependent on DAF-16 and autophagy, both activated by trehalose  
15 (Seo et al., 2018). In arrested L1 larvae, trehalose supports starvation survival  
16 (Hibshman et al., 2017). However, here we tested for a different role of trehalose,  
17 as a possible signaling molecule that would determine the effect of density. A  
18 similar role has been described in plants, where trehalose-6-phosphate works as  
19 signal of sugar availability and regulates responses to starvation (Elbein et al.,  
20 2003; Smeeckens et al., 2010). To work as a communication signal, trehalose  
21 should be free in the medium, transiently at least. In fact, we detected the  
22 presence of trehalose in the media of arrested wild-type and the DAF-16::GFP  
23 reporter strain (Supp. Fig. 2B). Importantly, the concentration of trehalose was  
24 proportional to the number of larvae hatched and it was in the  $\mu\text{M}$  range (Fig. 4A).  
25 Internal trehalose concentration previously determined in L1 larvae was in the

1 range of 100 nmol/mg protein in both starved and fed animals (Hibshman et al.,  
2 2017). This amount was already present in the embryos before hatching and  
3 increased within the 12 hours after hatching in the starved animals, meanwhile it  
4 decreased in the fed ones (Hibshman et al., 2017). Our measurements are not  
5 comparable, since we analyzed the trehalose in the supernatant and they  
6 measured the trehalose present in the whole animal. A concentration higher than  
7 20 mM is needed to see the protective effect of trehalose during the L1 starvation,  
8 being 50 mM the concentration used for most of those experiments (Hibshman  
9 et al., 2017). That represents a concentration 10,000 times higher than that  
10 detected in the supernatant. Therefore, it appears that, for trehalose to play its  
11 direct role as stress protectant, it must be in large quantities. Additionally to its  
12 protective role, trehalose works as energy source when added at high  
13 concentration, since it has to be hydrolyzed to glucose by the action of the  
14 trehalase enzymes in order to observe its complete beneficial effect on survival  
15 (Hibshman et al., 2017). However, what we propose here is a signaling role for  
16 trehalose, where it works at low concentration, being sensed by the animals and  
17 then triggering a response. Our data suggests that, for that role, trehalose does  
18 not need to be consumed, as we observe an increase in the amount of trehalose  
19 present in the supernatant of arrested L1s over the time in starvation (Fig. 4A).  
20 Furthermore, the small amount of trehalose that we measured in the supernatant  
21 was enough to reduce DAF-28 production and to activate DAF-16 (Fig. 4B and  
22 4C). This response is contrary to what is expected for a sugar that works as  
23 carbon and energy source, as it happens in the case of glucose (Lee et al., 2009)  
24 or when food is perceived (Kaplan et al., 2018). In these cases, insulin signaling

1 is enhanced and DAF-16 inactivated. Therefore, the role of trehalose described  
2 here is different to other roles as protectant and as energy source.

3 No trehalose content was previously detected in L1 larvae of the double *tps-1*;  
4 *tps-2* mutant, which lacks both trehalose synthases (Hibshman et al., 2017).  
5 Here, in the supernatant of the double *tps* mutant we detected about a third of  
6 the trehalose detected for the wild type (Supp. Fig. 4A). The trehalose reduction  
7 detected in the double mutant was sufficient to get reflected in a higher DAF-16  
8 inactivation compared to the wild type (Fig. 6D, Supp. Fig. 4C). We cannot be  
9 sure about the origin of this trehalose in the mutant, but we hypothesize that it  
10 was ingested by the mother with the food, then provided to the embryos and  
11 finally released during hatching. Trehalose is present at high concentration in the  
12 embryos of many different nematode species, and its participation is determinant  
13 for embryo development and for the hatching process (Behm, 1997). During  
14 hatching, the permeability of the innermost layer of the eggshell increases, which  
15 results in the leakage of trehalose and other metabolites (Behm, 1997; Perry,  
16 1989). Two protective roles of trehalose have been proposed in nematode eggs.  
17 One role would involve the stabilization of the lipid membrane of the eggshell,  
18 which would allow the resistance of the embryos to extreme environments. The  
19 second one would involve the release of trehalose to the surrounding medium,  
20 what would reduce the osmotic stress (Perry, 1989). However, although trehalose  
21 was found in *C. elegans* embryos before hatching (Hibshman et al., 2017), the  
22 function of trehalose in embryos of this nematode remains to be demonstrated.  
23 Nevertheless, it has been shown that *C. elegans* mothers can adapt the sugar  
24 provisioning to the embryos in response to changing environmental conditions  
25 (Dey et al., 2016; Frazier and Roth, 2009). The content in trehalose, glycogen

1 and glycerol changes in the embryos of mothers exposed to different stresses.  
2 More specifically, trehalose provisioning increased in embryos from mothers  
3 exposed to hyperosmotic stress (Frazier and Roth, 2009). Despite the relevance  
4 of trehalose in embryos, and the importance of maternal provisioning, it remains  
5 unexplored whether trehalose ingested by the mother (as opposed to synthesized  
6 by the worm) can be used to provide the embryos. A trehalose transporter in *C.*  
7 *elegans* has not been identified yet. However, in mammals, a glucose carrier is  
8 able to transport trehalose (Mayer et al., 2016). This could be a possibility to  
9 investigate in *C. elegans*, being the glucose carrier FGT-1 the closest homolog  
10 to the trehalose transporter Tret1-1 in *Drosophila*. Actually, the reduction in the  
11 expression of *fgt-1* leads to an extended longevity, not additive to the extension  
12 displayed in *daf-2* and *age-1* mutants, meaning that insulin signaling is reduced  
13 when *fgt-1* expression is down (Feng et al., 2013).

14 To work as a signaling molecule, trehalose must be sensed by the animals. Here  
15 we tested GUR-3, the closest homolog to Gr5a in *C. elegans*, as a possible  
16 trehalose receptor. Gr5a is a G protein-coupled gustatory receptor of *Drosophila*  
17 required to activate behavioral and sensory responses to trehalose (Chyb et al.,  
18 2003). Trehalose sensing in *Drosophila* regulates lifespan and the mutant lacking  
19 Gr5a lives shorter (Waterson et al., 2015). In flies, trehalose is the most abundant  
20 circulating sugar, and in the *gr5a* mutant there is an increased trehalose  
21 synthesis in an attempt to compensate for the lack of trehalose sensing  
22 (Waterson et al., 2015). This is a clear example of trehalose functioning as a  
23 signal molecule rather than a protective molecule. In our experiments we  
24 observed that the *gur-3* mutant is insensitive to trehalose in terms of DAF-16  
25 activation (Fig. 7). However, further investigation is needed to corroborate the

1 capacity of GUR-3 to sense trehalose in the medium and trigger the subsequent  
2 response. For instance, one of the questions to be addressed concerns the  
3 localization of GUR-3 in neurons different to ASI and ASJ, the sensory neurons  
4 where DAF-28 is mainly expressed in the head of the worms (Li et al., 2003). This  
5 seems to be important since the trehalose signaling that we propose here  
6 involves inhibition of the DAF-28 production (Fig. 4C) and probably of other ILPs.  
7 Thus, new studies could reveal the connection between these neurons or the  
8 location of the GUR-3 receptor in more neuronal types to the ones already  
9 described. However, different mechanisms or receptors cannot be completely  
10 discarded at this point. An example of alternative mechanism is what was found  
11 in mammals where trehalose binds and blocks the glucose carriers SLC2A to  
12 induce autophagy (DeBosch et al., 2016).

13 Although low concentrations of trehalose activated DAF-16 in our experiments,  
14 this response was not sufficient to support starvation survival and recovery of  
15 animals arrested at low density (Fig. 5A and B). This makes us think that  
16 trehalose could work triggering the response only at the first moments of  
17 starvation and that the participation of other molecules would be then necessary.  
18 Actually, even when trehalose secretion continues over the arrest period (Fig.  
19 4A), we only observed the effect of density on DAF-28 production after 1 day of  
20 arrest, but not on day 5 (Fig. 2E). Moreover, DAF-16 also becomes less active  
21 throughout prolonged starvation, independently of the density (Fig. 2D). The  
22 DAF-16 inactivation during long-term starvation had been previously described  
23 and it requires the activity of AGE-1, in a DAF-2 independent manner (Weinkove  
24 et al., 2006). This would decouple the inactivation of DAF-16 from the presence  
25 of trehalose after the first days of the prolonged starvation. Therefore, the role of



1 trehalose in this response would be restricted to the first days of arrest, probably  
2 due to the later activation of additional mechanisms or pathways, such as AGE-  
3 1, which would limit the response to trehalose. Consistent with the idea that  
4 additional molecules are involved in the density effect, we found recovery  
5 percentage enhancement by trehalose addition in larvae starved at high density  
6 where the original medium containing the secreted molecules was removed. This  
7 was clear in the double *tps* mutant (Fig. 6B), since there was not active trehalose  
8 production, despite some trehalose possibly contained in the embryos, as  
9 previously discussed.

10 The synthesis of a disaccharide in the absence of food appears to be paradoxical,  
11 but trehalose is known to be protective, and as such it acts on arrested L1 larvae,  
12 where it supports survival (Hibshman et al., 2017). It also seems clear that it can  
13 be used as an energy source as a last resort. However, what we propose here is  
14 an additional role in the communication between animals. On this role, trehalose  
15 would trigger the response against stress in the animal that senses the signal.  
16 This response involves the IIS pathway, which gets inactivated in the first  
17 moments of prolonged starvation, supporting starvation survival. However, to  
18 maintain the effect on survival and recovery, the participation of other unknown  
19 secreted molecules is needed. Nevertheless, this resistance mechanism is lost  
20 in animals arrested at low density, since secreted signals are diluted, and the  
21 response is not activated sufficiently. Therefore, in order to resist environmental  
22 stresses, remaining as high-density population is beneficial for *C. elegans*.

23

24

25

## 1 MATERIAL AND METHODS

### 2 *C. elegans* strains and growth conditions

3 We cultured and maintained animals according to standard methods (Brenner,  
4 1974), typically at 20 °C on nematode growth medium (NGM) plates seeded with  
5 a lawn of *Escherichia coli* OP50-1, used as nematode nutrient source. The N2  
6 Bristol strain background is referred in the text as wild type. We performed  
7 longevity assays on N2, CF1038 *daf-16(mu86) I*, and MOL273 *tps-1(ok373) X*;  
8 *tps-2(ok526) II*. We generated MOL273 using routine genetic techniques by  
9 crossing VC225 *tps-1(ok373) X* and RB760 *tps-2(ok526) II*. To quantify recovery  
10 time by luminometry we used the reporter strain MRS387 *svls1 [Psur-*  
11 *5::luc+::gfp] X* (Olmedo et al., 2020). To determine the subcellular localization of  
12 DAF-16 we used the strain TJ356 *zls356 [Pdaf-16::daf-16a/b-gfp; rol-6] IV*. We  
13 crossed TJ356 with CB1377 *daf-6(e1377) X*, PR678 *tax-4(p678) III*, MOL273 *tps-*  
14 *1(ok373) X*; *tps-2(ok526) II* and RB1755 *gur-3(ok2245) X* to generate MOL274  
15 *daf-6(e1377) X*; *zls356[Pdaf-16::daf-16a/b-gfp; rol-6] IV*, MOL216 *tax-4(p678) III*;  
16 *zls356[Pdaf-16::daf-16a/b-gfp; rol-6] IV*, MOL271 *tps-1(ok373) X*; *tps-2(ok526) II*;  
17 *zls356[Pdaf-16::daf-16a/b-gfp; rol-6] IV* and MOL276 *gur-3(ok2245) X*;  
18 *zls356[Pdaf-16::daf-16a/b-gfp; rol-6] IV*. We used the strain VB1605 *svls69[Pdaf-*  
19 *28::DAF-28::GFP]* to quantify DAF-28 expression in the head of the arrested  
20 larvae. We crossed this strain with CF1038 to generate MOL224 *daf-16(mu86) I*;  
21 *svls69[Pdaf-28::DAF-28::GFP]*. The strains not generated here were obtained  
22 from the Caenorhabditis Genetics Center (CGC).

23 To arrest L1 larvae by starvation we first obtained embryos from gravid adults by  
24 treatment with alkaline hypochlorite solution. Those embryos were incubated in  
25 M9 minimum medium at 20°C with gentle shaking leading to their hatching. These

1 larvae newly hatched in absence of food arrest their development as L1. The  
2 density of the worm culture was adjusted to the indicated in every experiment  
3 after embryo preparation. Although after hatching the population density may  
4 vary from the calculated, we considered it important to adjust immediately after  
5 embryo preparation, so that the larvae already hatched at the approximate  
6 desired density and the released compounds they encountered are consequently  
7 at high or low concentration. For recovery experiments depicted in Fig. 1, where  
8 different starvation times were applied, we staggered the embryo preparation to  
9 be able to simultaneously analyze the recovery of animals with different periods  
10 of arrest.

11 For the experiments in which we washed off the medium where the animals  
12 hatched, we spun down twice the samples of arrested L1s during 2 min at 850 g  
13 and resuspended the animals into clean M9. In parallel, we also centrifuged the  
14 controls, but, in these cases, animals were not resuspended in clean M9 but in  
15 their original medium.

16 To prepare the conditioned medium (CM), we obtained embryos and adjusted  
17 the sample density at higher than 50 embryos/ $\mu$ l. The day after we counted the  
18 number of hatched animals so we could adjust the arrested L1s to a final  
19 concentration of 50 L1/ $\mu$ l. We then centrifuged them twice during 10 min at 5000  
20 g to collect the supernatant without larvae. We froze this CM at -20 °C until the  
21 moment of use.

22

### 23 **Determination of recovery time**

24 Time needed to recover after prolonged periods of arrest was measured using a  
25 bioluminescence-based method that allows the precise quantification of every

1 larval and molt stage during the post-embryonic development (Olmedo et al.,  
2 2015). Briefly, arrested L1 larvae were individually pipetted into a well of a white  
3 96-well plate containing 200  $\mu$ M Luciferin in 100  $\mu$ l of S-basal (including 10  $\mu$ g/ml  
4 of cholesterol prepared in ethanol). Once all animals were placed into the plate,  
5 we added the food to resume development. Thus, we pipetted into every well 100  
6  $\mu$ l of S-basal containing 20 g/l of *E. coli* OP50-1. Prior to measuring, we sealed  
7 the plates with a gas-permeable cover (Breath Easier, Diversified Biotech). Then,  
8 luminescence of each animal was recorded by a highly sensitive microplate  
9 luminometer (Berthold Centro LB960 XS<sup>3</sup>) for 1 s at intervals of 5 min until  
10 animals reached adulthood. Luminometers were kept inside temperature-  
11 controlled incubators (Panasonic MIR-154) to maintain a constant 20 °C  
12 temperature during the experiments. We used sample sizes of more than 20  
13 animals per condition and experiment in, at least, three biological replicates. The  
14 luminometry data for each animal was analyzed individually and, for statistics, we  
15 used the averages of independent replicates to avoid the inflated N value from  
16 using individual animals. The analysis was performed as previously described  
17 (Olmedo et al., 2015). We use a template in MS-Excel for analysis of the  
18 luminescence signal and GraphPad Prism for statistics and graphs. The data  
19 collected by this technique allowed the calculation of the recovery time (L1) (Fig.  
20 1B), the developmental timing (M1 to M4) (Supp. Fig. 1A) and the complete the  
21 post-embryonic development (L1 to M4) (Supp. Fig. 1B) for every animal  
22 analyzed.

23

#### 24 **Analysis of the recovery percentage**

25 To score the survival capacity to starvation of the arrested L1 larvae we

1 calculated the percentage of animals able to recover when fed after prolonged  
2 starvation. To do that, we pipetted every 2-3 days a fix number of L1s arrested at  
3 the indicated densities onto NGM plates with food and after 2 days we counted  
4 the number of animals that were alive and did progress in development. We  
5 monitored the plates for few days more in case that some animals needed more  
6 time to recover, especially after long periods of starvation. The percentage of  
7 recovery on each day was calculated relative to the day with the maximum  
8 number of worms recovered for each strain or condition. This maximum was  
9 taken as the 100 %. We performed, at least, three independent biological  
10 replicates per experiment. All replicates were plotted together, and the medium  
11 survival curves were fit to these data. The half-life of each biological replicate was  
12 independently calculated for statistics. Curve fitting and half-lives were calculated  
13 using the analysis tools available in GraphPad Prism software.

14

### 15 **Subcellular localization of DAF-16**

16 To determine the subcellular localization of DAF-16 we used the strains  
17 expressing the fluorescently tagged version of DAF-16 (DAF-16::GFP) described  
18 above. At the indicated times, we took aliquots of 18  $\mu$ l of the suspensions of  
19 arrested L1 larvae and we placed them on a microscope slide with 2  $\mu$ l of 10 mM  
20 Levamisole to paralyze the animals. We used a Leica M205 FCA stereo  
21 microscope to visualize DAF-16::GFP. Thus, we counted the number of animals  
22 with nuclear, cytoplasmatic or intermediate localization of DAF-16 in a population  
23 of, at least, 100 animals per sample. With these data, we calculated the  
24 percentage animals with each localization of DAF-16. We performed a minimum  
25 of 3 independent biological replicates. To avoid the artificial translocation of DAF-

1 16 we used a reduced concentration of Levamisole. In the same way, during the  
2 visualization the room temperature was kept at 20 °C to avoid the possible effect  
3 of temperature in DAF-16 activation.

#### 4 5 **DAF-28::GFP quantification**

6 We used strains containing a translational GFP reporter of DAF-28 to quantify its  
7 expression in the head of the arrested L1 larvae. We took aliquots of 10 µl from  
8 suspensions of L1s arrested to the indicated densities after 1 or 5 days of arrest  
9 and we placed them on a microscope slide with 1 µl of 10 mM Levamisole to  
10 paralyze the animals. We then acquired pictures of these worms using a Leica  
11 M205 FCA stereo microscope. We analyzed those pictures with FIJI software,  
12 which allowed us to measure the signal intensity of a selected area. We analyzed  
13 more than 20 animals per condition and experiment, and we performed a  
14 minimum of 3 individual biological replicates per experiment. Due to  
15 discrepancies in the raw data between replicates, we normalized the signal  
16 measured for each worm to the average signal of the replicate. We used the  
17 averages of the normalized signal per condition and replicate to perform the  
18 statistics analysis.

#### 19 20 **Trehalose measurement**

21 Trehalose content in the medium of arrested L1 larvae was measured by  
22 enzymatic determination of released glucose after hydrolysis of trehalose by  
23 trehalase enzyme, using the glucose oxidase/oxidase method (Sigma catalog  
24 #GAGO-20). We spun down the L1 cultures for 5 min at 5000 g to remove the  
25 animals and we collected the supernatant for measurement. We added

1 potassium phosphate buffer pH 6 to the samples to a final concentration of 0.1 M  
2 and trehalase enzyme (SIGMA) to 1.5 U/ml. This mix was incubated overnight at  
3 37 °C with no shaking. We then added the glucose oxidase/oxidase mix  
4 containing 10 U/ml glucose oxidase, 2 U/ml horseradish peroxidase and 80 µg/ml  
5 O-dianisidine. We incubated the samples at 37 °C for 30 min, we then added  
6 H<sub>2</sub>SO<sub>4</sub> at a final concentration of 4.3 N and we measured the OD of the samples  
7 at 540 nm. A standard curve was prepared in parallel with known concentrations  
8 of trehalose, so we could transform OD values into trehalose content. For each  
9 sample we performed a parallel reaction in which trehalase was substituted by  
10 water in order to detect free glucose, what would make us overestimate the  
11 content in trehalose. We referred the trehalose content measured to the number  
12 of larvae actually hatched for each sample, what we determined the day after egg  
13 preparation.

14

## 15 **ACKNOWLEDGMENTS**

16 Some strains were provided by the *Caenorhabditis* Genetics Center (CGC),  
17 which is funded by NIH Office of Research Infrastructure Programs (P40  
18 OD010440). We thank Ryan Baugh (Duke University) for helpful discussion. M.O  
19 is supported by the Ramón y Cajal program of the Spanish Ministerio de  
20 Economía y Competitividad, (RYC-2014-15551). Our work is supported by the  
21 Spanish Ministerio de Economía y Competitividad (BFU2016-74949-P), the  
22 European Research Council (ERC-2011-StG-281691) and a Marie-Curie Intra-  
23 European Fellowship (FP7-PEOPLE-2013-IEF/GA Nr: 627263).

24

25

1  
2  
3  
4  
5  
6  
7  
8  
9  
10  
11  
12  
13  
14  
15  
16  
17  
18  
19  
20  
21  
22  
23  
24  
25

## Bibliography

Artyukhin AB, Schroeder FC, Avery L. 2013a. Density dependence in *Caenorhabditis* larval starvation. *Sci Rep* **3**:2777. doi:10.1038/srep02777

Artyukhin AB, Yim JJ, Cheong Cheong M, Avery L. 2015. Starvation-induced collective behavior in *C. elegans*. *Sci Rep* **5**:10647. doi:10.1038/srep10647

Artyukhin AB, Yim JJ, Srinivasan J, Izrayelit Y, Bose N, Reuss SH von, Jo Y, Jordan JM, Baugh LR, Cheong M, Sternberg PW, Avery L, Schroeder FC. 2013b. Succinylated Octopamine Ascarosides and a New Pathway of Biogenic Amine Metabolism in *Caenorhabditis elegans*. *J Biol Chem* **288**:18778–18783. doi:10.1074/JBC.C113.477000

Baugh LR, DeModena J, Sternberg PW. 2009. RNA Pol II Accumulates at Promoters of Growth Genes During Developmental Arrest. *Science (80- )* **324**:92–94. doi:10.1126/SCIENCE.1169628

Baugh LR, Sternberg PW. 2006. DAF-16/FOXO regulates transcription of *cki-1/Cip/Kip* and repression of *lin-4* during *C. elegans* L1 arrest. *Curr Biol* **16**:780–5. doi:10.1016/j.cub.2006.03.021

Baugh LR, Sutton AJ, Sundermeyer ML, Albert PS, King K V, Edgley ML, Larsen PL, Riddle DL. 2013. To grow or not to grow: nutritional control of development during *Caenorhabditis elegans* L1 arrest. *Genetics* **194**:539–55. doi:10.1534/genetics.113.150847

Behm CA. 1997. The role of trehalose in the physiology of nematodes. *Int J Parasitol* **27**:215–229. doi:10.1016/S0020-7519(96)00151-8

Benabentos R, Hirose S, Sucgang R, Curk T, Kato M, Ostrowski EA, Strassmann JE, Queller DC, Zupan B, Shaulsky G, Kuspa A. 2009.



1 Polymorphic Members of the lag Gene Family Mediate Kin Discrimination  
2 in Dictyostelium. *Curr Biol* **19**:567–572. doi:10.1016/J.CUB.2009.02.037

3 Bhatla N, Horvitz HR. 2015. Light and Hydrogen Peroxide Inhibit C. elegans  
4 Feeding through Gustatory Receptor Orthologs and Pharyngeal Neurons.  
5 *Neuron* **85**:804–818. doi:10.1016/J.NEURON.2014.12.061

6 Boender AJ, Roubos EW, van der Velde G. 2011. Together or alone? Foraging  
7 strategies in Caenorhabditis elegans. *Biol Rev* **86**:853–862.  
8 doi:10.1111/j.1469-185X.2011.00174.x

9 Brenner S. 1974. The genetics of Caenorhabditis elegans. *Genetics* **77**:71–94.

10 Brückner A, Parker J. 2020. Molecular evolution of gland cell types and  
11 chemical interactions in animals. *J Exp Biol* **223**. doi:10.1242/JEB.211938

12 Butcher RA. 2017. Decoding chemical communication in nematodes. *Nat Prod*  
13 *Rep* **34**:472–477. doi:10.1039/C7NP00007C

14 Butcher RA, Fujita M, Schroeder FC, Clardy J. 2007. Small-molecule  
15 pheromones that control dauer development in Caenorhabditis elegans.  
16 *Nat Chem Biol* **3**:420–422. doi:10.1038/nchembio.2007.3

17 Chen Y, Baugh LR. 2014. Ins-4 and daf-28 function redundantly to regulate C.  
18 elegans L1 arrest. *Dev Biol* **394**:314–326.  
19 doi:10.1016/J.YDBIO.2014.08.002

20 Chyb S, Dahanukar A, Wickens A, Carlson JR. 2003. Drosophila Gr5a encodes  
21 a taste receptor tuned to trehalose. *Proc Natl Acad Sci* **100**:14526–14530.  
22 doi:10.1073/PNAS.2135339100

23 Coombes HA, Stockley P, Hurst JL. 2018. Female Chemical Signalling  
24 Underlying Reproduction in Mammals. *J Chem Ecol* **44**:851–873.  
25 doi:10.1007/s10886-018-0981-x

- 1 Crowe JH. 2007. Trehalose as a &quot;chemical chaperone&quot;; fact and  
2 fantasy. *Adv Exp Med Biol* **594**:143–58. doi:10.1007/978-0-387-39975-  
3 1\_13
- 4 de Bono M, Tobin DM, Davis MW, Avery L, Bargmann CI. 2002. Social feeding  
5 in *Caenorhabditis elegans* is induced by neurons that detect aversive  
6 stimuli. *Nature* **419**:899–903. doi:10.1038/nature01169
- 7 DeBosch BJ, Heitmeier MR, Mayer AL, Higgins CB, Crowley JR, Kraft TE, Chi  
8 M, Newberry EP, Chen Z, Finck BN, Davidson NO, Yarasheski KE, Hruz  
9 PW, Moley KH. 2016. Trehalose inhibits solute carrier 2A (SLC2A) proteins  
10 to induce autophagy and prevent hepatic steatosis. *Sci Signal* **9**.  
11 doi:10.1126/scisignal.aac5472
- 12 Dey S, Proulx SR, Teotónio H. 2016. Adaptation to Temporally Fluctuating  
13 Environments by the Evolution of Maternal Effects. *PLOS Biol*  
14 **14**:e1002388. doi:10.1371/journal.pbio.1002388
- 15 Doyle WI, Meeks JP. 2018. Excreted Steroids in Vertebrate Social  
16 Communication. *J Neurosci* **38**:3377–3387.  
17 doi:10.1523/JNEUROSCI.2488-17.2018
- 18 Elbein AD, Pan YT, Pastuszak I, Carroll D. 2003. New insights on trehalose: a  
19 multifunctional molecule. *Glycobiology* **13**:17R – 27.  
20 doi:10.1093/glycob/cwg047
- 21 Erkut C, Penkov S, Khesbak H, Vorkel D, Verbavatz J-M, Fahmy K, Kurzchalia  
22 T V. 2011. Trehalose renders the dauer larva of *Caenorhabditis elegans*  
23 resistant to extreme desiccation. *Curr Biol* **21**:1331–6.  
24 doi:10.1016/j.cub.2011.06.064
- 25 Feng Y, Williams BG, Koumanov F, Wolstenholme AJ, Holman GD. 2013. FGT-

1 1 is the major glucose transporter in *C. elegans* and is central to aging  
2 pathways. *Biochem J* **456**:219–29. doi:10.1042/BJ20131101

3 Frazier HN, Roth MB. 2009. Adaptive Sugar Provisioning Controls Survival of *C.*  
4 *elegans* Embryos in Adverse Environments. *Curr Biol* **19**:859–863.  
5 doi:10.1016/J.CUB.2009.03.066

6 Golden J, Riddle D. 1982. A pheromone influences larval development in the  
7 nematode *Caenorhabditis elegans*. *Science (80- )* **218**:578–580.  
8 doi:10.1126/SCIENCE.6896933

9 Goya ME, Romanowski A, Caldart CS, Bénard CY, Golombek DA. 2016.  
10 Circadian rhythms identified in *Caenorhabditis elegans* by in vivo long-term  
11 monitoring of a bioluminescent reporter. *Proc Natl Acad Sci* **113**:E7837–  
12 E7845. doi:10.1073/PNAS.1605769113

13 Gray JM, Karow DS, Lu H, Chang AJ, Chang JS, Ellis RE, Marletta MA,  
14 Bargmann CI. 2004. Oxygen sensation and social feeding mediated by a  
15 *C. elegans* guanylate cyclase homologue. *Nature* **430**:317–322.  
16 doi:10.1038/nature02714

17 Greene JS, Brown M, Dobosiewicz M, Ishida IG, Macosko EZ, Zhang X,  
18 Butcher RA, Cline DJ, McGrath PT, Bargmann CI. 2016. Balancing  
19 selection shapes density-dependent foraging behaviour. *Nature* **539**:254–  
20 258. doi:10.1038/nature19848

21 Hibshman JD, Doan AE, Moore BT, Kaplan RE, Hung A, Webster AK, Bhatt  
22 DP, Chitrakar R, Hirschey MD, Baugh LR. 2017. *daf-16*/FoxO promotes  
23 gluconeogenesis and trehalose synthesis during starvation to support  
24 survival. *Elife* **6**. doi:10.7554/eLife.30057

25 Honda S, Ishii N, Suzuki K, Matsuo M. 1993. Oxygen-Dependent Perturbation

1 of Life Span and Aging Rate in the Nematode. *J Gerontol* **48**:B57–B61.  
2 doi:10.1093/geronj/48.2.B57

3 Honda Y, Tanaka M, Honda S. 2010. Trehalose extends longevity in the  
4 nematode *Caenorhabditis elegans*. *Aging Cell* **9**:558–569.  
5 doi:10.1111/j.1474-9726.2010.00582.x

6 Hu PJ. 2007. Dauer. *WormBook*. doi:10.1895/wormbook.1.144.1

7 Johnson TE, Mitchell DH, Kline S, Kemal R, Foy J. 1984. Arresting  
8 development arrests aging in the nematode *Caenorhabditis elegans*. *Mech*  
9 *Ageing Dev* **28**:23–40.

10 Kaplan REW, Maxwell CS, Codd NK, Baugh LR. 2019. Pervasive Positive and  
11 Negative Feedback Regulation of Insulin-Like Signaling in *Caenorhabditis*  
12 *elegans*. *Genetics* **211**:349–361. doi:10.1534/genetics.118.301702

13 Kaplan REW, Webster AK, Chitrakar R, Dent JA, Baugh LR. 2018. Food  
14 perception without ingestion leads to metabolic changes and irreversible  
15 developmental arrest in *C. elegans*. *BMC Biol* **16**:112. doi:10.1186/s12915-  
16 018-0579-3

17 Lee BH, Ashrafi K. 2008. A TRPV channel modulates *C. elegans*  
18 neurosecretion, larval starvation survival, and adult lifespan. *PLoS Genet*  
19 **4**:e1000213. doi:10.1371/journal.pgen.1000213

20 Lee S-J, Murphy CT, Kenyon C. 2009. Glucose shortens the life span of *C.*  
21 *elegans* by downregulating DAF-16/FOXO activity and aquaporin gene  
22 expression. *Cell Metab* **10**:379–91. doi:10.1016/j.cmet.2009.10.003

23 Li W, Kennedy SG, Ruvkun G. 2003. *daf-28* encodes a *C. elegans* insulin  
24 superfamily member that is regulated by environmental cues and acts in  
25 the DAF-2 signaling pathway. *Genes Dev* **17**:844–58.

1       doi:10.1101/gad.1066503

2   Ludewig AH, Gimond C, Judkins JC, Thornton S, Pulido DC, Micikas RJ, Döring  
3       F, Antebi A, Braendle C, Schroeder FC. 2017. Larval crowding accelerates  
4       C. elegans development and reduces lifespan. *PLoS Genet* **13**:e1006717.  
5       doi:10.1371/journal.pgen.1006717

6   Ludewig AH, Schroeder FC. 2013. Ascaroside signaling in C. elegans.  
7       *WormBook*. doi:10.1895/wormbook.1.155.1

8   MacOsko EZ, Pokala N, Feinberg EH, Chalasani SH, Butcher RA, Clardy J,  
9       Bargmann CI. 2009. A hub-and-spoke circuit drives pheromone attraction  
10       and social behaviour in C. elegans. *Nature* **458**:1171–1175.  
11       doi:10.1038/nature07886

12   Mayer AL, Higgins CB, Heitmeier MR, Kraft TE, Qian X, Crowley JR, Hyrc KL,  
13       Beatty WL, Yarasheski KE, Hruz PW, DeBosch BJ. 2016. SLC2A8  
14       (GLUT8) is a mammalian trehalose transporter required for trehalose-  
15       induced autophagy. *Sci Rep* **6**:38586. doi:10.1038/srep38586

16   Mukherjee S, Bassler BL. 2019. Bacterial quorum sensing in complex and  
17       dynamically changing environments. *Nat Rev Microbiol* **17**:371–382.  
18       doi:10.1038/s41579-019-0186-5

19   Muñoz MJ, Riddle DL. 2003. Positive selection of *Caenorhabditis elegans*  
20       mutants with increased stress resistance and longevity. *Genetics* **163**:171–  
21       180.

22   Murphy CT, Hu PJ. 2013. Insulin/insulin-like growth factor signaling in C.  
23       elegans. *WormBook*. doi:10.1895/wormbook.1.164.1

24   Oikonomou G, Perens EA, Lu Y, Watanabe S, Jorgensen EM, Shaham S.  
25       2011. Opposing Activities of LIT-1/NLK and DAF-6/Patched-Related Direct

1       Sensory Compartment Morphogenesis in *C. elegans*. *PLoS Biol*  
2       **9**:e1001121. doi:10.1371/journal.pbio.1001121

3       Olmedo M, Geibel M, Artal-Sanz M, Merrow M. 2015. A high-throughput method  
4       for the analysis of larval developmental phenotypes in *Caenorhabditis*  
5       *elegans*. *Genetics* **201**:443–448. doi:10.1534/genetics.115.179242

6       Olmedo M, Mata-Cabana A, Jesús Rodríguez-Palero M, García-Sánchez S,  
7       Fernández-Yañez A, Merrow M, Artal-Sanz M. 2020. Prolonged  
8       quiescence delays somatic stem cell-like divisions in *Caenorhabditis*  
9       *elegans* and is controlled by insulin signaling. *Aging Cell* **19**:e13085.  
10       doi:10.1111/accel.13085

11       Perry RN. 1989. Dormancy and hatching of nematode eggs. *Parasitol Today*  
12       **5**:377–383. doi:10.1016/0169-4758(89)90299-8

13       Pierce SB, Costa M, Wisotzkey R, Devadhar S, Homburger SA, Buchman AR,  
14       Ferguson KC, Heller J, Platt DM, Pasquinelli AA, Liu LX, Doberstein SK,  
15       Ruvkun G. 2001. Regulation of DAF-2 receptor signaling by human insulin  
16       and ins-1, a member of the unusually large and diverse *C. elegans* insulin  
17       gene family. *Genes Dev* **15**:672–686. doi:10.1101/GAD.867301

18       Rogers C, Persson A, Cheung B, de Bono M. 2006. Behavioral Motifs and  
19       Neural Pathways Coordinating O<sub>2</sub> Responses and Aggregation in *C.*  
20       *elegans*. *Curr Biol* **16**:649–659. doi:10.1016/J.CUB.2006.03.023

21       Roux AE, Langhans K, Huynh W, Kenyon C. 2016. Reversible Age-Related  
22       Phenotypes Induced during Larval Quiescence in *C. elegans*. *Cell Metab*  
23       **23**:1113–1126. doi:10.1016/j.cmet.2016.05.024

24       Seo Y, Kingsley S, Walker G, Mondoux MA, Tissenbaum HA. 2018. Metabolic  
25       shift from glycogen to trehalose promotes lifespan and healthspan in

1 Caenorhabditis elegans. *Proc Natl Acad Sci U S A* **115**:E2791–E2800.  
2 doi:10.1073/pnas.1714178115

3 Singer MA, Lindquist S. 1998. Multiple effects of trehalose on protein folding in  
4 vitro and in vivo. *Mol Cell* **1**:639–48. doi:10.1016/s1097-2765(00)80064-7

5 Smeekens S, Ma J, Hanson J, Rolland F. 2010. Sugar signals and molecular  
6 networks controlling plant growth. *Curr Opin Plant Biol* **13**:273–278.  
7 doi:10.1016/J.PBI.2009.12.002

8 Sokolowski MB. 2010. Social Interactions in “Simple” Model Systems. *Neuron*  
9 **65**:780–794. doi:10.1016/J.NEURON.2010.03.007

10 Srinivasan J, Kaplan F, Ajredini R, Zachariah C, Alborn HT, Teal PEA, Malik  
11 RU, Edison AS, Sternberg PW, Schroeder FC. 2008. A blend of small  
12 molecules regulates both mating and development in *Caenorhabditis*  
13 *elegans*. *Nature* **454**:1115–8. doi:10.1038/nature07168

14 Srinivasan J, von Reuss SH, Bose N, Zaslaver A, Mahanti P, Ho MC, O’Doherty  
15 OG, Edison AS, Sternberg PW, Schroeder FC. 2012. A modular library of  
16 small molecule signals regulates social behaviors in *Caenorhabditis*  
17 *elegans*. *PLoS Biol* **10**. doi:10.1371/journal.pbio.1001237

18 Taga ME, Bassler BL. 2003. Chemical communication among bacteria. *Proc*  
19 *Natl Acad Sci* **100**:14549–14554. doi:10.1073/PNAS.1934514100

20 Waterson MJ, Chan TP, Pletcher SD. 2015. Adaptive Physiological Response  
21 to Perceived Scarcity as a Mechanism of Sensory Modulation of Life Span.  
22 *Journals Gerontol Ser A Biol Sci Med Sci* **70**:1088–1091.  
23 doi:10.1093/gerona/glv039

24 Weinkove D, Halstead J, Gems D, Divecha N. 2006. Long-term starvation and  
25 ageing induce AGE-1/PI 3-kinase-dependent translocation of DAF-

1           16/FOXO to the cytoplasm. *BMC Biol* **4**:1. doi:10.1186/1741-7007-4-1  
2 Yan H, Jafari S, Pask G, Zhou X, Reinberg D, Desplan C. 2020. Evolution,  
3 developmental expression and function of odorant receptors in insects. *J*  
4 *Exp Biol* **223**. doi:10.1242/JEB.208215

5  
6  
7  
8  
9  
10  
11  
12  
13  
14  
15  
16  
17  
18  
19  
20  
21  
22  
23  
24  
25



1  
2  
3  
4  
5  
6  
7  
8  
9  
10  
11  
12  
13  
14  
15  
16  
17  
18  
19  
20  
21  
22  
23  
24  
25  
26  
27  
28  
29  
30

**Supplementary material for:**

**Social chemical communication determines recovery from L1 arrest via  
DAF-16 activation.**

Alejandro Mata-Cabana<sup>1</sup>, Laura Gómez-Delgado<sup>1</sup>, Francisco Javier Romero-  
Expósito<sup>1</sup>, María Jesús Rodríguez-Palero<sup>2</sup>, Marta Artal-Sanz<sup>2</sup> and María  
Olmedo<sup>1</sup>

1. Departamento de Genética, Facultad de Biología, Universidad de Sevilla,  
Avenida Reina Mercedes s/n, 41012 Seville, Spain

2. Andalusian Center for Developmental Biology, Consejo Superior de  
Investigaciones Científicas/Junta de Andalucía/Universidad Pablo de Olavide.  
Department of Molecular Biology and Biochemical Engineering. Carretera de  
Utrera Km 1, 41013 Seville, Spain.

Correspondence: amata@us.es, mariaolmedo@us.es

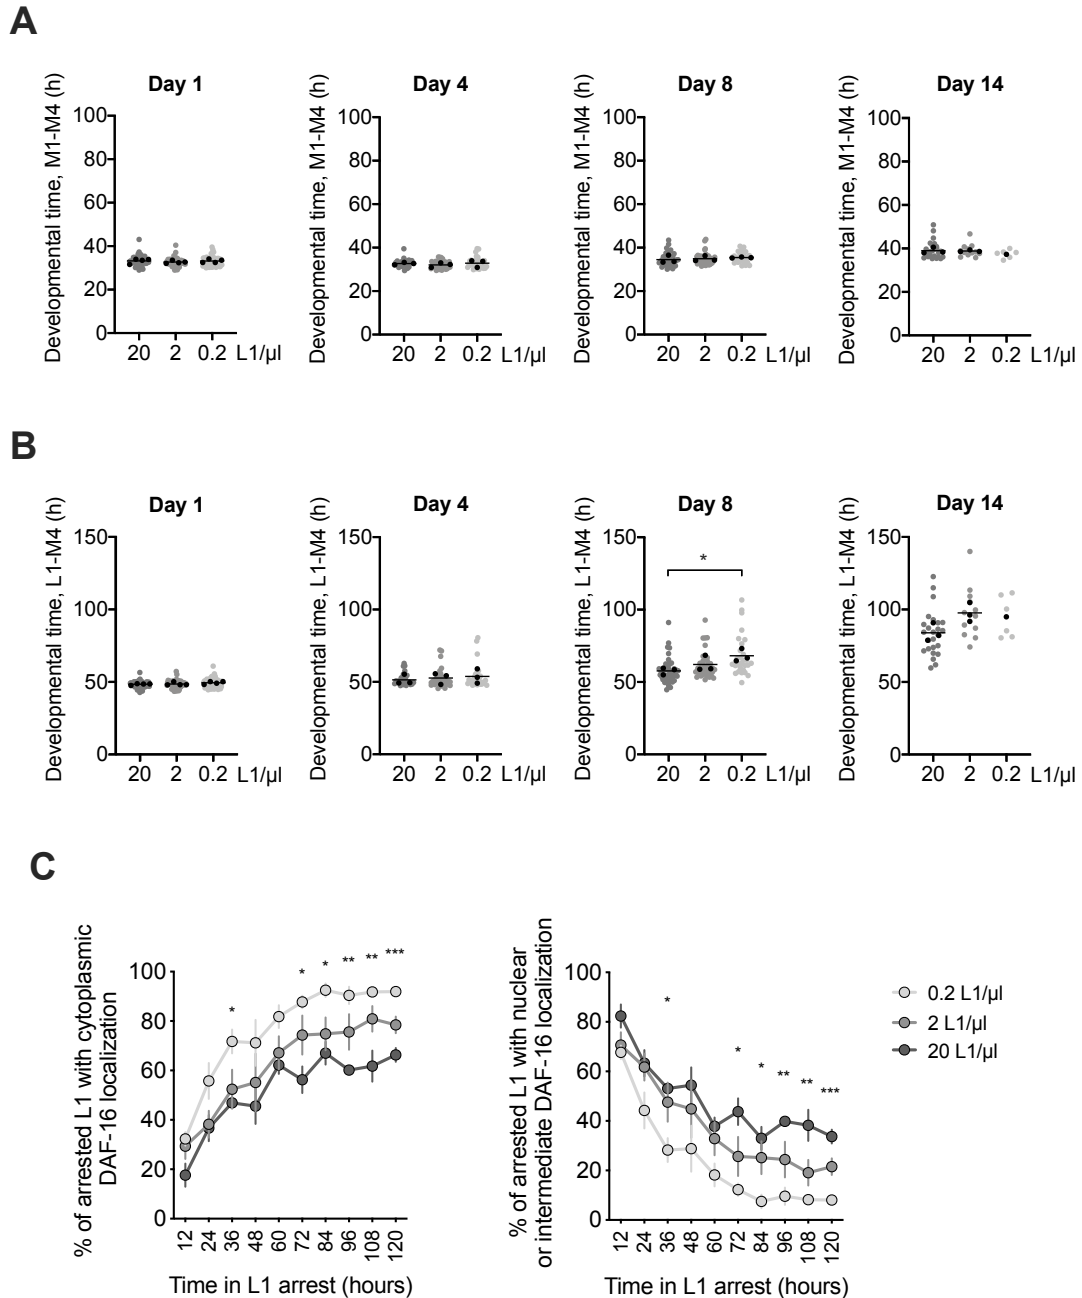

1  
2  
3  
4  
5  
6  
7  
8  
9  
10  
11  
12

**Supplementary Figure 1.** Developmental time (M1 to M4) (A) and complete the post-embryonic development (L1 to M4) (B) of animals arrested at densities of 20, 2 and 0.2 L1/ $\mu$ l, after 1, 4, 8 and 14 days of starvation. All individual animals from three independent biological replicates are plotted. Black dots represent the average of each independent replicate and the black line indicates the mean of the entire experiment. Averages of the replicates were used for statistics (\*  $p < 0.05$ , Unpaired t-test). (C) Subcellular localization of DAF-16::GFP in L1 larvae arrested at densities of 20, 2 and 0.2 L1/ $\mu$ l for 1 to 5 days in starvation. Dots indicate the mean of four independent replicates and the error bars represent the SEM (\*  $p < 0.05$ , \*\*  $p < 0.01$ , \*\*\*  $p < 0.001$ , one-way ANOVA).

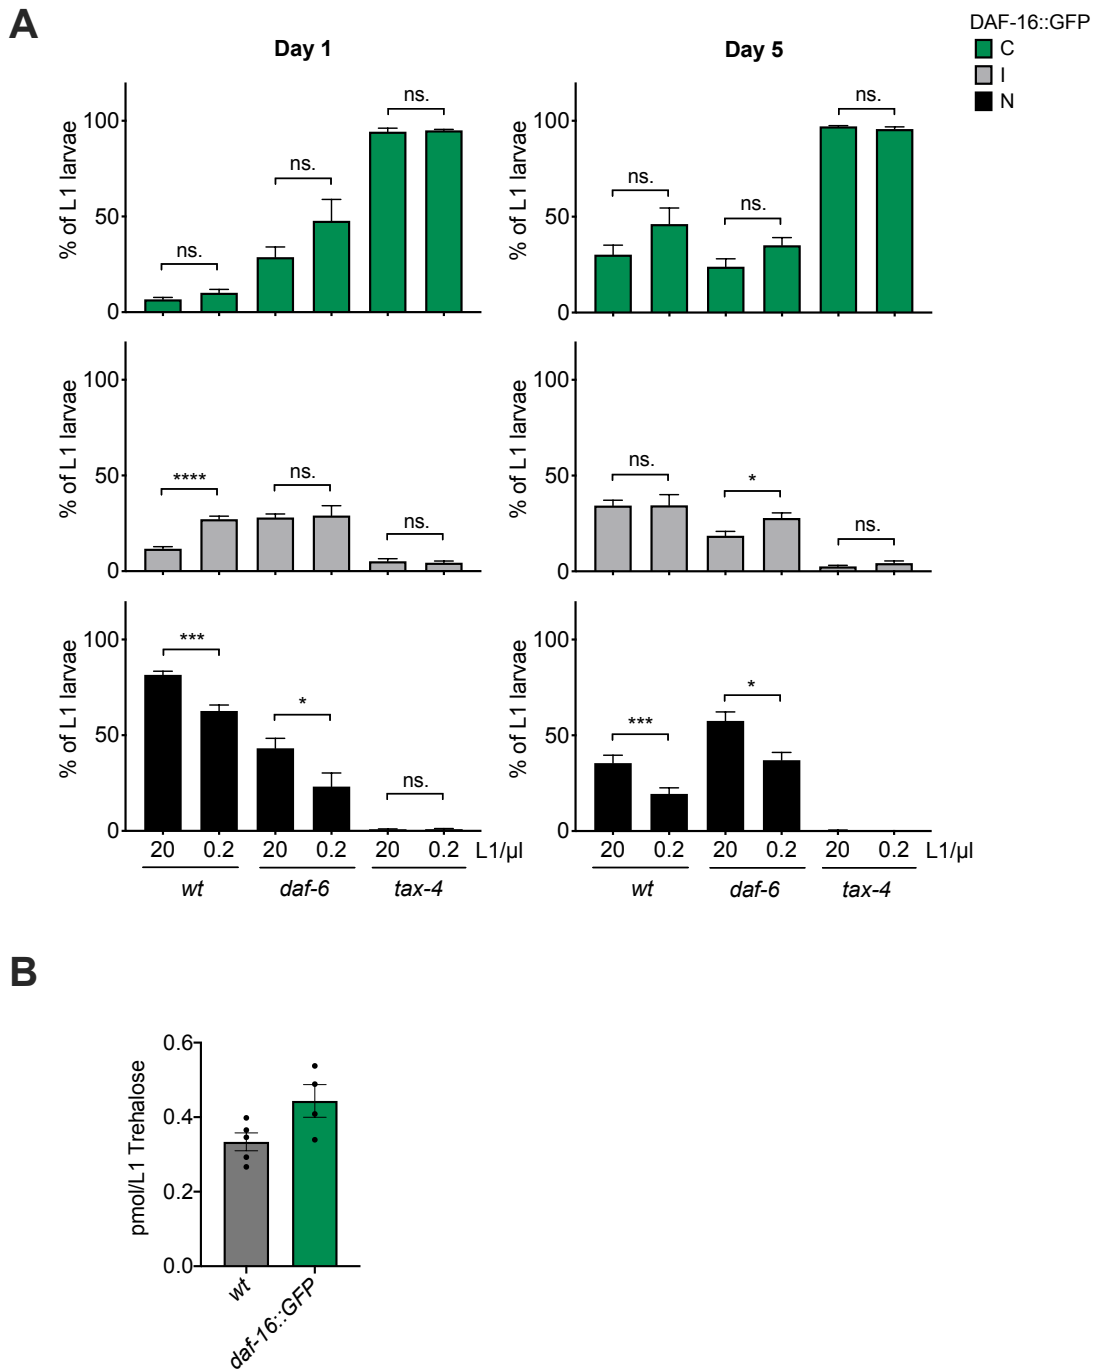

1  
 2  
 3 **Supplementary Figure 2.** (A) Subcellular localization of DAF-16::GFP in L1 larvae  
 4 arrested at 20 and 0.2 L1/ $\mu$ l for 1 and 5 days in *wt*, *daf-6* and *tax-4* mutant strains.  
 5 Percentage of animals with cytoplasmatic localization are shown in the top panel,  
 6 percentage of animals with intermediate localization are in the middle panel and nuclear  
 7 localization of DAF-16 is shown in the bottom panel. The histograms show the means  
 8 of, at least, three independent replicates and the error bars represent the SEM (\*  $p < 0.05$ ,  
 9 \*\*\*  $p < 0.001$ , \*\*\*\*  $p < 0.0001$ , Unpaired t-test). (B) Relative trehalose content per hatched  
 10 animal in the medium of wild-type and TJ356 reporter strain, which expresses DAF-  
 11 16::GFP.  
 12

1

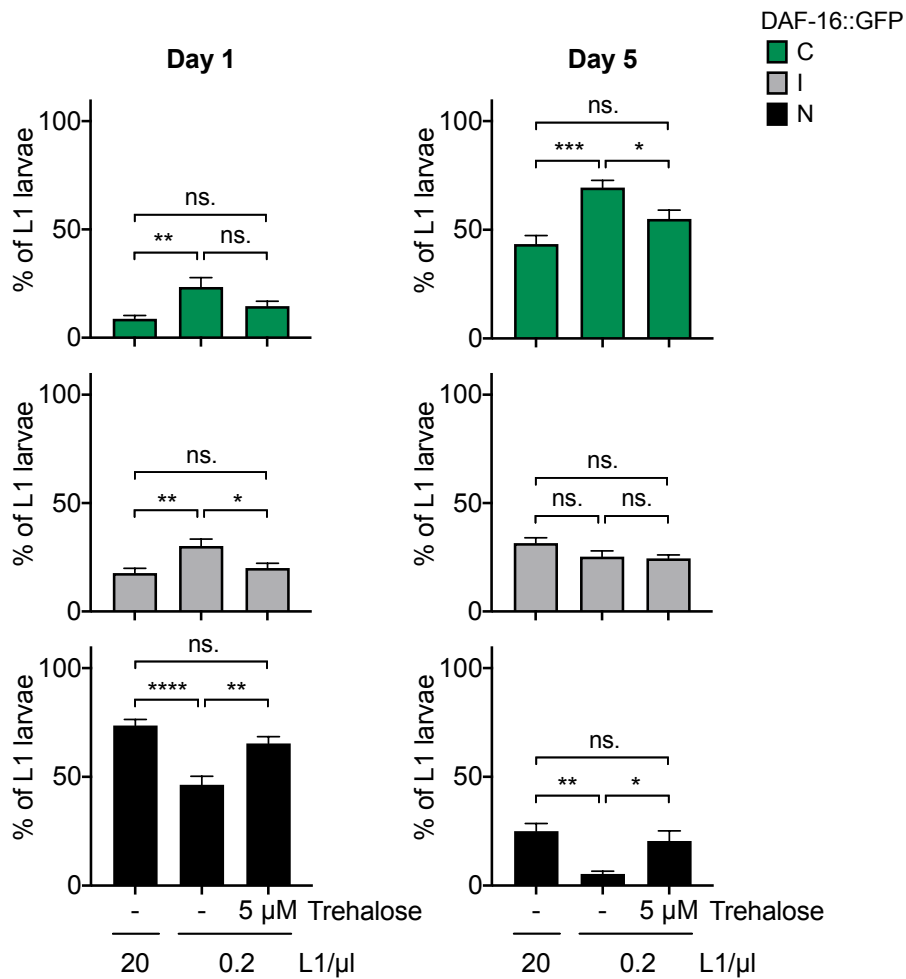

2

3

4

5

6

7

8

9

10

11

12

13

14

15

16

17

18

19

**Supplementary Figure 3.** Effect on the subcellular localization of DAF-16::GFP of the addition of 5 μM of trehalose to L1 larvae arrested at 0.2 L1/μl after 1 and 5 days of starvation when compared with animals arrested at 20 and 0.2 L1/μl with no trehalose addition. Percentage of animals with cytoplasmic localization are shown in the top panel, percentage of animals with intermediate localization are in the middle panel and nuclear localization of DAF-16 is shown in the bottom panel. The histograms show the means of eight independent replicates and the error bars represent the SEM (\* p<0.05, \*\* p<0.01, \*\*\*\* p<0.0001, one-way ANOVA).

**A**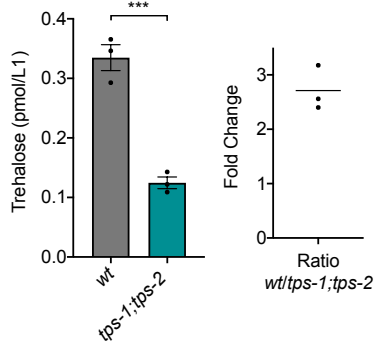**B**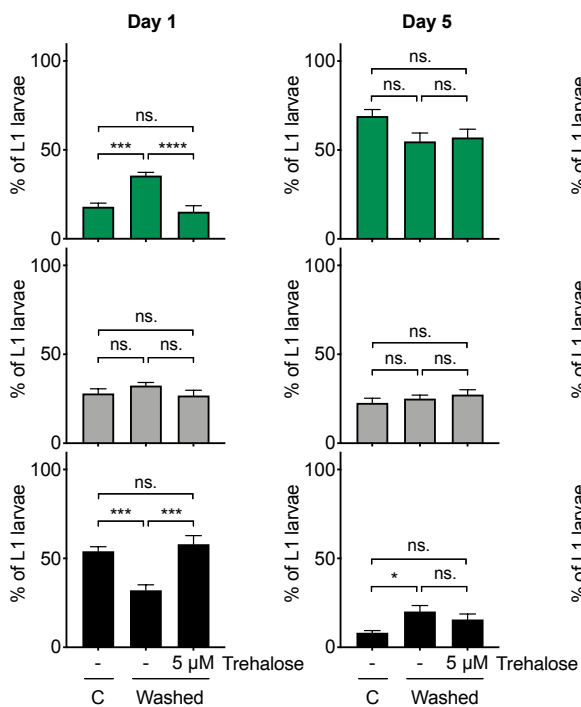**C**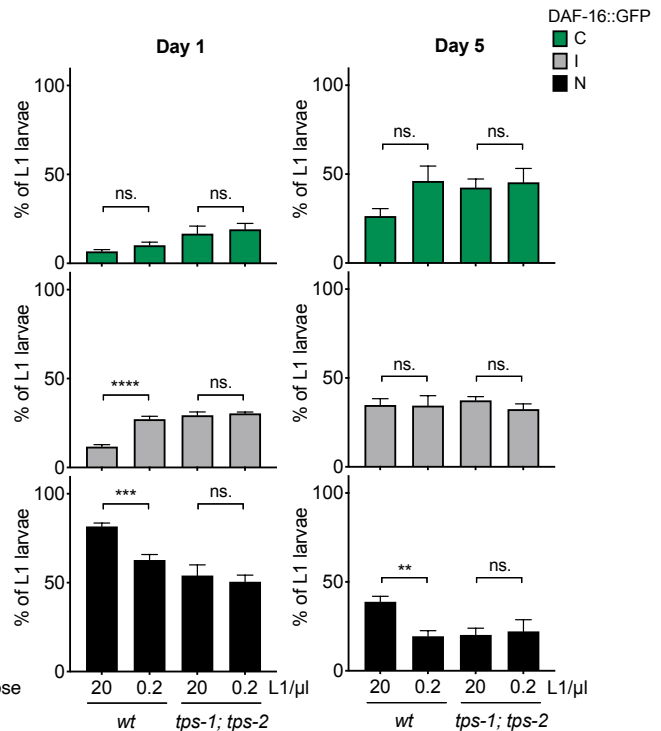

1 **Supplementary Figure 4.** (A) In the left panel, relative trehalose content per hatched  
 2 animal in the medium of wild-type and *tps-1; tps-2* strains. Black dots represent the  
 3 average of each independent replicate. The bars mark the mean of the entire experiment  
 4 and error bars shows the SEM. Averages of each replicate were used for statistics (\*\*  
 5  $p < 0.001$ , Unpaired t-test). In the right panel, trehalose content ratio between wild type  
 6 and *tps-1; tps-2* independently calculated for each replicate. The horizontal line indicates  
 7 the mean of the three replicates. (B) Subcellular localization of DAF-16::GFP in L1 larvae  
 8 arrested at 20 L1/μl at 1 and 5 days after washing the medium. Trehalose was added to  
 9 one sample to a final concentration of 5 μM. In control sample the original medium was  
 10 not removed and trehalose was not added. (C) Subcellular localization of DAF-16::GFP  
 11 in wild-type and *tps-1; tps-2* L1 larvae arrested at 20 and 0.2 L1/μl, after 1 and 5 days of  
 12 starvation. (C and D) Percentage of animals with cytoplasmic localization are shown  
 13 in the top panel, percentage of animals with intermediate localization are in the middle  
 14 panel and nuclear localization of DAF-16 is shown in the bottom panel. The histograms  
 15 show the means of, at least, four independent replicates and the error bars represent the  
 16 SEM (\*  $p < 0.05$ , \*\*  $p < 0.01$ , \*\*\*  $p < 0.001$ , \*\*\*\*  $p < 0.0001$ , one-way ANOVA in (C) and  
 17 Unpaired t-test in (D)).

**A**

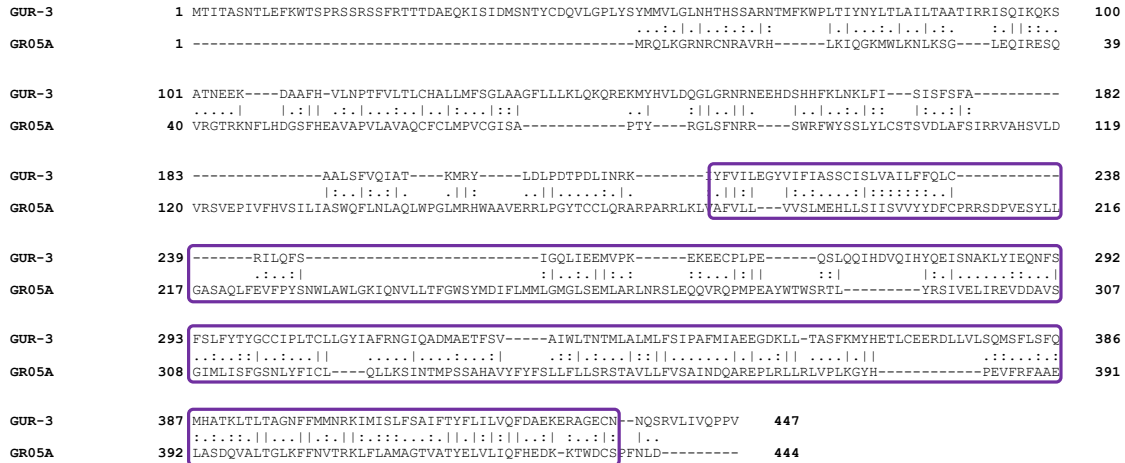

Trehalose receptor domain

**B**

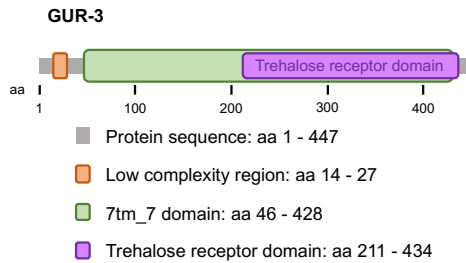

**C**

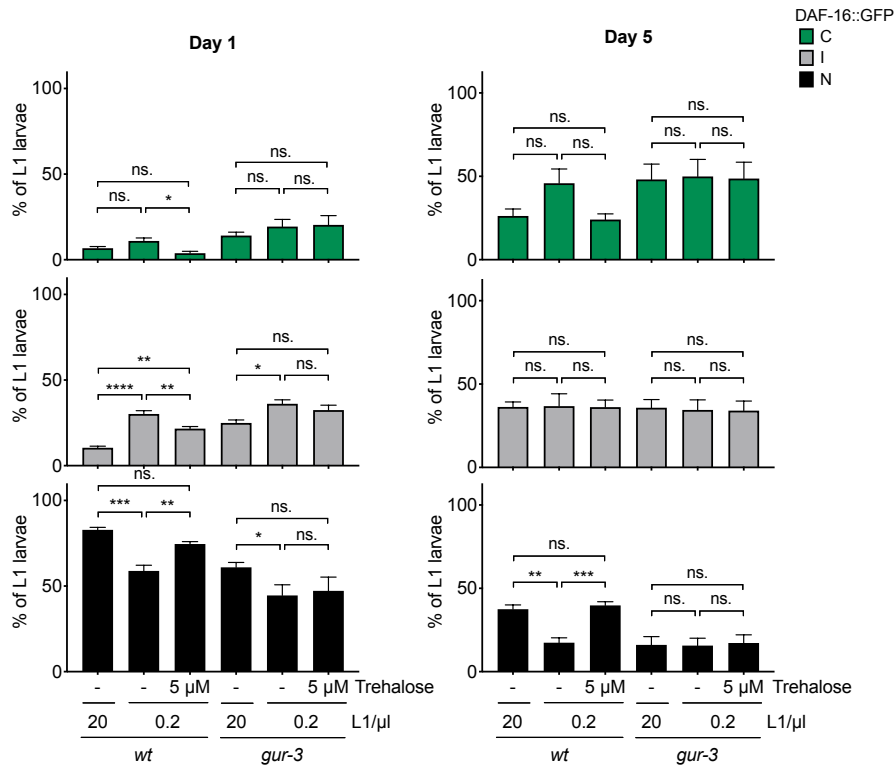

- 1 **Supplementary Figure 5.** (A) Pairwise protein sequence alignment between GUR-3 and
- 2 Gr5a using EMBOSS-Needle tool ([https://www.ebi.ac.uk/Tools/psa/emboss\\_needle/](https://www.ebi.ac.uk/Tools/psa/emboss_needle/)).
- 3 Predicted trehalose receptor domain is framed in purple. (B) Schematic representation
- 4 of GUR-3 protein domains. Prediction was performed using SMART on-line tool

1 (<http://smart.embl-heidelberg.de/>). (C) Subcellular localization of DAF-16::GFP in wild-  
2 type and *gur-3* L1 larvae arrested at 20 and 0.2 L1/μl after 1 and 5 days of starvation.  
3 Trehalose to a final concentration of 5 μM was added to animals at low density. Animals  
4 at high density were used as control. Percentage of animals with cytoplasmatic  
5 localization are shown in the top panel, percentage of animals with intermediate  
6 localization are in the middle panel and nuclear localization of DAF-16 is shown in the  
7 bottom panel. The histograms show the means of, at least, three independent replicates  
8 and the error bars represent the SEM (\* p<0.05, \*\* p<0.01, \*\*\* p<0.001, \*\*\*\* p<0.0001,  
9 one-way ANOVA).

10

11

12
